# 1 **Topological design principle for the robustness of necroptosis biphasic,** 2 **emergent, and coexistent (BEC) dynamics**

3  
4 Fei Xu<sup>1,7</sup>, Xiang Li<sup>1,2,7,\*</sup>, Rui Wu<sup>2</sup>, Hong Qi<sup>3</sup>, Jun Jin<sup>1</sup>, Zhilong Liu<sup>1</sup>, Yuning Wu<sup>4</sup>, Hai Lin<sup>5</sup>,  
5 Chuansheng Shen<sup>6</sup>, Jianwei Shuai<sup>1,2,5,\*</sup>

6  
7 <sup>1</sup>Department of Physics and Fujian Provincial Key Laboratory for Soft Functional Materials  
8 Research, Xiamen University, Xiamen 361005, China.

9 <sup>2</sup>National Institute for Data Science in Health and Medicine and State Key Laboratory of Cellular  
10 Stress Biology, Innovation Center for Cell Signaling Network, School of Life Sciences, Xiamen  
11 University, Xiamen 361102, China.

12 <sup>3</sup>Complex Systems Research Center, Shanxi University, Taiyuan 030006, China.

13 <sup>4</sup>Department of Mathematics and Physics, Fujian Jiangxia University, Fuzhou 350108, China.

14 <sup>5</sup>Oujiang Laboratory (Zhejiang Lab for Regenerative Medicine, Vision and Brain Health) and  
15 Wenzhou Institute, University of Chinese Academy of Sciences, Wenzhou 325001, China

16 <sup>6</sup>School of Mathematics and Physics, Anqing Normal University, Anqing 246011, China.

17 <sup>7</sup>These authors contributed equally to this work.

18  
19 \*Correspondence: [xianglibp@xmu.edu.cn](mailto:xianglibp@xmu.edu.cn) (X.L.); [jianweishuai@xmu.edu.cn](mailto:jianweishuai@xmu.edu.cn) (J.S.)

21 **Abstract**

22       Biphasic dynamics, the variable-dependent ability to enhance or restrain biological function,  
23 is prevalent in natural systems. Accompanied by biphasic dynamics, necroptosis signaling  
24 dominated by RIP1 also appears emergent and coexistent dynamics. Here, we identify the RIP1-  
25 RIP3-C8 incoherent feedforward loop embedded with positive feedback of RIP3 to RIP1 is the core  
26 topology, and the scale-free feature of RIP3 peak value dictates necroptosis BEC dynamics.  
27 Entropy production is introduced to quantify the uncertainty of coexistent dynamics. RIP3 auto-  
28 phosphorylation is further determined as a complementary process for robustly attaining  
29 necroptosis BEC dynamics. Through screening all possible two- and three-node circuit topologies,  
30 a complete atlas of three-node circuit BEC dynamics is generated and only three minimal circuits  
31 emerge as robust solutions, proving incoherent feedforward loop is the core topology. Overall,  
32 through highlighting a finite set of circuits, this study yields guiding principles for mapping,  
33 modulating, and designing circuits for BEC dynamics in biological systems.

34

## 35 **Introduction**

36 Biphasic behavior has been observed in a broad range of biological processes to drive essential  
37 physiological and developmental functions, such as cell differentiation<sup>1</sup>, proliferation<sup>2</sup>, and death<sup>3</sup>.  
38 Biphasic behavior can be broadly categorized into time-dependent and dose-dependent. Time-  
39 dependent biphasic behavior means the output response (*e.g.*, gene expression, protein activation,  
40 and ionic concentration, etc.) is increased with time at initial stage but becomes decreased over time.  
41 Conversely, the initial decrease and later increase could also be regarded as time-dependent  
42 biphasic behavior. Pulse and adaption are the typical time-dependent biphasic behaviors<sup>4-6</sup>, such as  
43 the transient ERK activation induced by growth factors<sup>6</sup> and the PhoQ activation induced by ADP  
44 affinity in bacterial two-component system<sup>7</sup>. Dose-dependent biphasic behavior refers to that the  
45 output increases (or decreases) first and then decreases (or increases) with the increase of the input,  
46 such as the biphasic dose dependence on Norepinephrine in cyclic AMP signaling<sup>8</sup>, and the blue-  
47 light-dependent phosphorylation of Arabidopsis cryptochrome 2 in HEK293 cells<sup>9</sup>.

48 Biphasic behavior in biological systems that crosses the tipping point frequently accompanies  
49 by the emergence of new patterns. Emergent dynamic is the biological function outcomes of  
50 collective interaction among various components, such as the patterns of chimera states and  
51 synchronization triggered by cell-to-cell interactions<sup>10,11</sup>. Most recently, we found RIP1  
52 biphastically regulates RIP3 phosphorylation with necroptosis emergence in TNF-induced cell death  
53 signaling<sup>12</sup>. However, how the signaling topology is intrinsically related to RIP3 biphasic dynamics  
54 with emergence and how the biphasic dynamics are regulated, have not been elucidated. Exploring  
55 the link between biological functions and the design principles of biological networks is a  
56 fundamental challenge to understand how living organisms can perform various functions  
57 efficiently and accurately. The theories of network science have been proven to be powerful tools<sup>13-</sup>  
58 <sup>15</sup>. Despite the apparent complexity and diversity of cell signaling, only a limited number of  
59 topologies might be capable of robustly executing particular function. Ma et al. successfully

60 dissected the principle for the design of network topologies that robustly achieve adaptation<sup>4</sup>. Li et  
61 al. validated that the robustness of biological oscillators is enhanced by the incoherent inputs<sup>16</sup>. The  
62 design principle for robust oscillatory behaviors with respect to noise also have been demonstrated  
63 recently<sup>17</sup>. Thus, revealing the properties of how biphasic and emergent dynamics are controlled  
64 and tailored in natural systems are urgently needed as well for understanding and optimizing  
65 biological regulatory strategies.

66 Starting with searching the essential structure to achieve RIP3 biphasic dynamics with  
67 necroptosis emergence, a TNF-induced death circuit model that well reproduces the experimental  
68 observations is proposed. The RIP1-RIP3-C8 incoherent feedforward loop is determined to be the  
69 core topology for biphasic dynamics with emergence induction, while the positive feedback of RIP1  
70 activated by RIP3 dominates the coexistence of necroptosis and apoptosis. A scale-free feature of  
71 RIP3 peak value and the Bell-shaped regulation of RIP3 biphasic dynamics are further identified  
72 and analyzed. Previous study suggested that scale-free networks are empirically rare<sup>18</sup>, and the  
73 scale-free feature of RIP3 phosphorylation might be highly related to our recently determined  
74 composition of RIP1-RIP3 signaling hub<sup>19</sup>. To quantify the uncertainty of the coexistent dynamics,  
75 entropy production of the system is measured through introducing potential landscape and Shannon  
76 entropy theories for the first time. Instead of exploring the mechanisms in a specific system, random  
77 parameter analysis of the TNF circuit model is also performed, confirming the biphasic dynamics  
78 with emergence is the intrinsic properties of the death signaling topology. Besides the positive  
79 feedback of RIP1 activated by RIP3, the positive feedback of RIP3 self-activation embedded within  
80 the RIP1-RIP3-C8 incoherent feedforward loop is another fundamental structure for achieving the  
81 biphasic, emergent, and coexistent (BEC) dynamics. Finally, an exhausting search of all possible  
82 two- and three-node network topologies is performed to identify those capable of biphasic dynamics  
83 with emergence, and three categories of minimal circuits are obtained. Based on the minimal circuit,  
84 an optimal circuit structure for robustly achieving BEC dynamics is further proposed, which is

85 highly consistent with the experimentally observed RIP1-RIP3-C8 circuit. Overall, all the evidence  
86 we obtained in this study indicates that the incoherent feedforward loop embedded with positive  
87 feedback is a generalizable design principle for the induction of BEC dynamics in diverse biological  
88 systems.

89

## 90 **Results**

### 91 **Necroptosis BEC dynamics within TNF-induced death circuit**

92 TNF is a multi-functional cytokine that can induce apoptosis or necroptosis depending on cellular  
93 contexts<sup>20-22</sup>. The schematic diagram of TNF-induced apoptosis and necroptosis signaling pathway  
94 is shown in Figure 1A. To intuitively address the relation of the core module, the reactions, such as  
95 association/disassociation, and cascades reaction can be coarsely described to present a conceptual  
96 core signaling circuit as shown in Figure 1B. Upon stimulation, TNF combines with TNFR1 to  
97 recruit TRADD and RIP1 to form complex-I and then activates them (Figure 1A)<sup>23</sup>, which can be  
98 simplified as TNF activating TRADD and RIP1 in Figure 1B. The competition between TRADD  
99 and RIP1 for binding TNFR1 is described as mutual inhibition<sup>24</sup>. Activation of C8 by sufficient  
100 TRADD in complex-II (labeled as C8-IIa) could result in apoptosis. When apoptosis occurs, the  
101 cell volume becomes small and the nucleus shrinks<sup>25</sup>. Besides, C8 could also be activated by RIP1  
102 in necrosome (labeled as C8-IIb)<sup>26</sup>. In necrosome, C8 inhibits the phosphorylation of RIP1 and  
103 RIP3 through cleaving RIP1-RIP3 complex<sup>27</sup>. Phosphorylation of RIP3, the marker of necroptosis<sup>21</sup>,  
104 also blocks C8 activation by recruiting RSK<sup>28</sup>. RIP1 and RIP3 activate each other through their  
105 RHIM-domain, forming a positive feedback loop for the recruitment of MLKL and necroptosis  
106 induction<sup>29,30</sup>. As a result, the TNF-induced death dynamics are mainly determined by five  
107 components, *i.e.*, activated TRADD (acTRADD), phosphorylated RIP1 (pRIP1), phosphorylated  
108 RIP3 (pRIP3), C8 activated by TRADD (C8-IIa), and C8 activated by RIP1 (C8-IIb) (Figure 1B).

109 As the western blotting data shown in Figure 1C, RIP1 knockdown (RIP1 shRNA) accelerates  
110 RIP3/MLKL phosphorylation, while RIP1 deletion (RIP1 KO) completely blocks RIP3/MLKL  
111 phosphorylation, presenting a biphasic dynamics of necroptosis regulated by RIP1. Decrease of  
112 RIP1 also promotes C8 activation, suggesting the suppression role of RIP1 in apoptosis (Figure 1C).  
113 To fully understand the essential topology for achieving the biphasic dynamics in the death  
114 signaling, a self-evolving ODEs model is constructed based on the circuit shown in Figure 1B  
115 (Supplementary Text). The circuit model well reproduces the experimental observations of C8 and  
116 RIP3 activation under different RIP1 levels (Figures 1D and 1E). pRIP3 presents an abrupt and  
117 large increase at low level of RIP1, triggering the emergent dynamics of necroptosis (Figure 1E).  
118 pRIP3 is then gradually reduced with further increase of RIP1. While C8 activation is linearly  
119 reduced with RIP1 increase. Experiments show that the deletion of RIP1-induced C8 activation is  
120 completely blocked in TRADD deletion cells (Figure 1F), proving that RIP1 suppresses apoptosis  
121 through restraining TRADD-dependent C8 activation. Consistently, our circuit model can also  
122 quantitatively reproduce the experimental observations and further provides a comprehensive  
123 analysis result, showing the decrease of TRADD results in a progressive reduction of C8 activation  
124 at varying RIP1 levels (Figure 1G).

125 As RIP3 and C8 can be simultaneously activated (Figure 1C), coexistence death mode of  
126 apoptosis and necroptosis in cells could be triggered by proper RIP1 level. Experimental analysis  
127 of cell morphology suggests that only necroptosis occurs in wild-type (WT) cells (100% RIP1),  
128 while apoptosis can solely be observed in RIP1 deletion cells (0% RIP1) (Figure 1H, upper panel).  
129 As expected, both necroptosis and apoptosis can be observed in RIP1-impaired cells. The RIP1-  
130 induced cell death mode can be well described by potential landscape theory, which provides a  
131 more physical description of the stochastic dynamic and global stability of the biological system<sup>31-</sup>  
132 <sup>33</sup>. Consistent with experimental observations, the middle panel from left to right in Figure 1H are  
133 the landscape topography of RIP1 deletion (single apoptosis state), RIP1 impairment (coexistent

134 state of apoptosis and necroptosis), and WT (single necroptosis state) systems that are mapped in  
135 the C8-RIP3 phase space. The kinetic pathway (KP) of the system evolving from random initial  
136 state (RIS) in the bottom panel of Figure 1H visually presents how the decision of death mode is  
137 made under different RIP1 levels. With low or high RIP1 level, cells eventually have a unique death  
138 mode of apoptosis or necroptosis. While cells have two mode choices with proper RIP1 level,  
139 inducing the coexistent dynamics of apoptosis and necroptosis. Thus, above comparisons confirm  
140 that our circuit model has the potential for giving mechanistic insights into the pRIP3/necroptosis  
141 BEC dynamics within the TNF-induced death signaling.



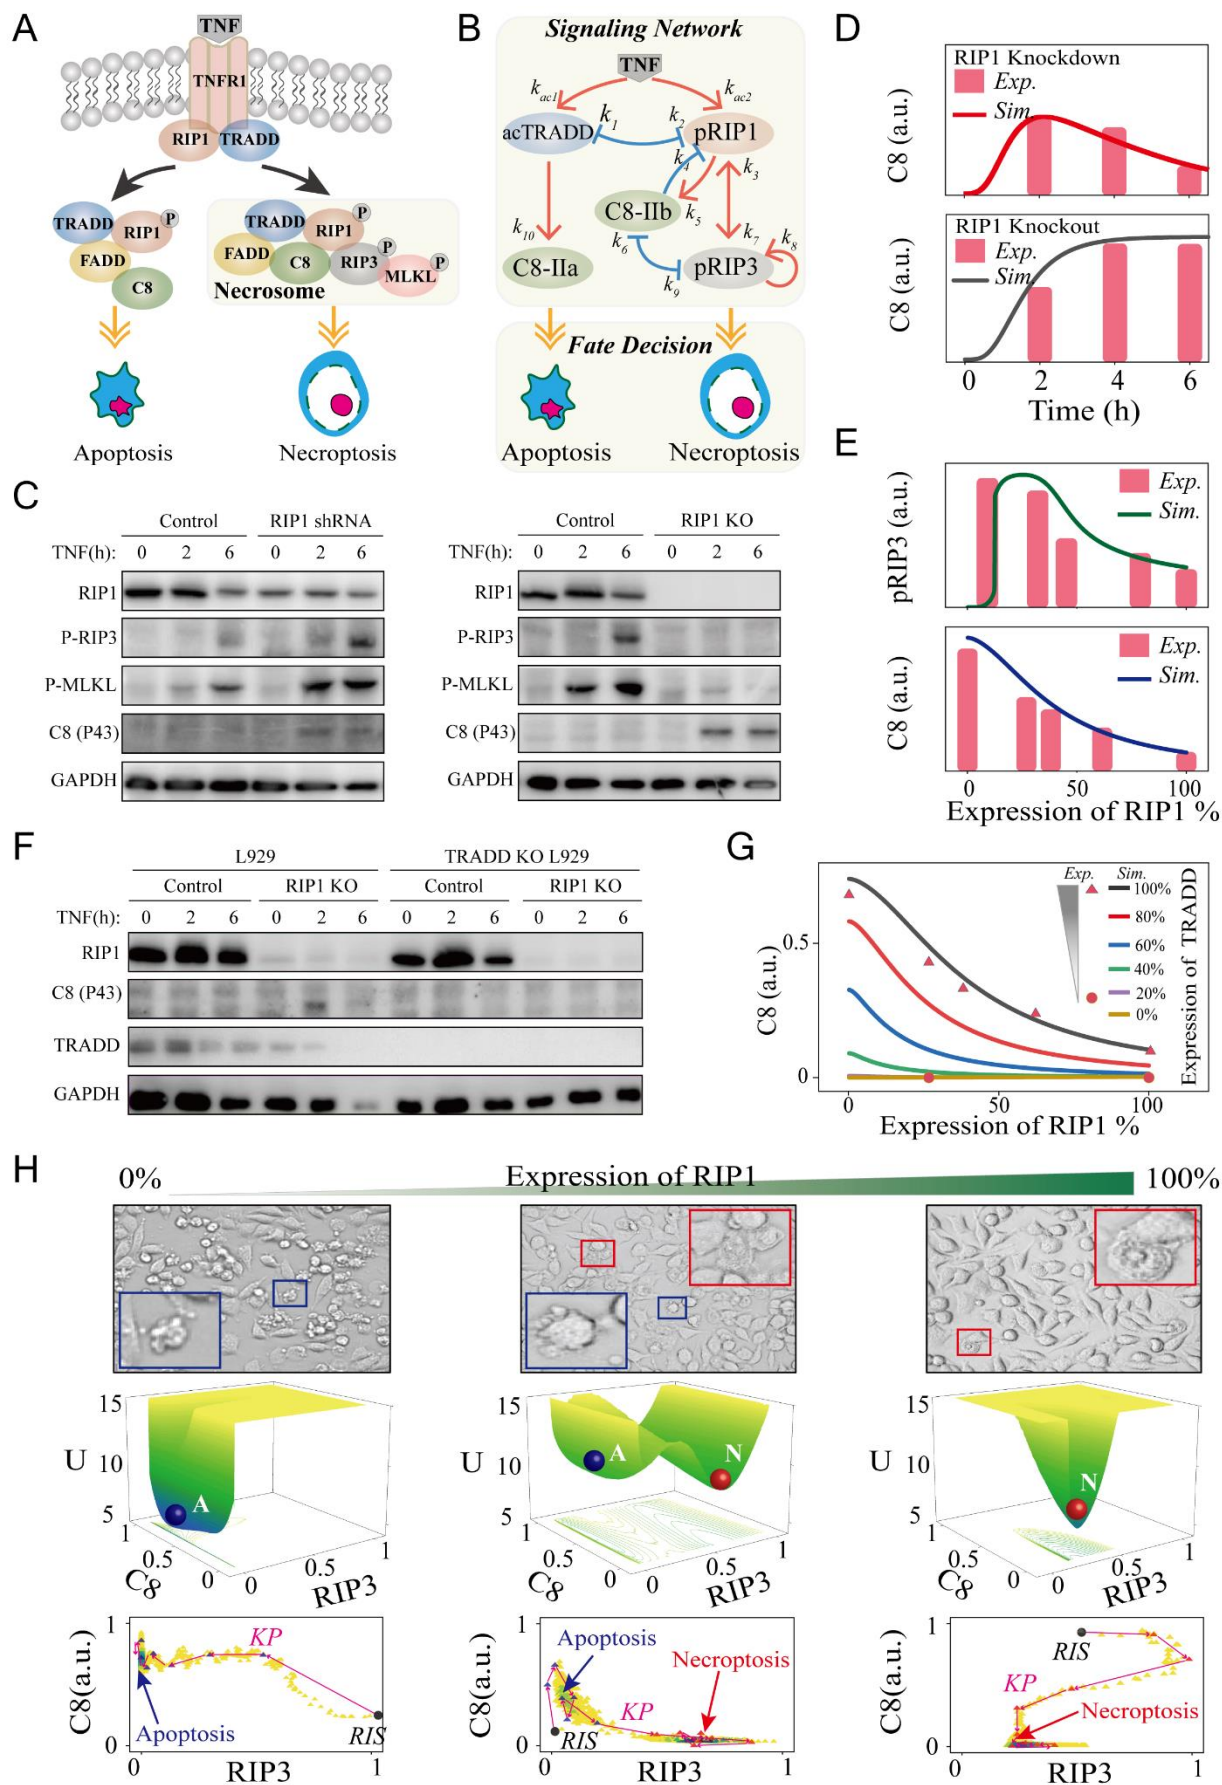



144 **Figure 1. Data-driven modeling of the TNF-induced cell death circuit.** (A) Schematic diagram  
145 of TNF-induced apoptosis and necroptosis signaling pathway. (B) The coarse-grained signaling  
146 network model. (C) Western blot analysis of the effects of RIP1 knockdown (shRNA) or knockout  
147 (KO) on indicated proteins activation. (D) Comparison between experimental data (histograms) and  
148 simulation results (lines) of the time-course responses of C8 in RIP1 knockdown (upper panel) and  
149 RIP1 knockout (down panel) cells. (E) Comparison between experimental data (histograms) and  
150 simulation results (lines) of RIP1-dependent pRIP3 response (upper panel) and C8 activation  
151 response (down panel). (F) Western blot analysis of TRADD knockout on indicated protein  
152 activation for wildtype and RIP1 knockout cells. (G) Comparison between experimental data (dots)  
153 and simulation results (lines) of the effect of TRADD level on RIP1-dependent C8 activation.  
154 (H) Cell morphologies under different expression levels of RIP1. The red and blue boxes indicate  
155 the represented apoptotic and necroptotic cells, respectively. Potential landscape reveals switch in  
156 cell death modes under different levels of RIP1 and the corresponding kinetic pathways (KP) of  
157 system evolution from random initial states (RIS).

158

### 159 **RIP1-RIP3-C8 incoherent feedforward loop determines necroptosis BEC dynamics**

160 To dissect the essential topology for the BEC dynamics of pRIP3 induced by RIP1, roles of TRADD  
161 and C8 are first explored. Biphasic and emergent (BE) dynamics of pRIP3 are not affected by  
162 TRADD deletion (Figure 2A, blue line), but disappear in the absence of C8 (Figure 2A, green line),  
163 implying that C8 is the essential node for BE dynamics. Deletion of C8 barely affects the emergence  
164 of pRIP3, and pRIP3 level keeps constant with further increase of RIP1. Thus, the dynamics of  
165 pRIP3 consists of two processes: when RIP1 increases from 0 to a low critical level (~10% RIP1),  
166 pRIP3 increases abruptly, inducing the emergent dynamics of necroptosis. While with the increase  
167 of RIP1, inhibition of C8 on pRIP3 takes effect, causing pRIP3 gently decreases.

168 Then, the nine interaction terms among RIP1, RIP3, and C8 in the irreducible circuit model  
169 are respectively removed to determine the essential terms (Figure 2B). BE dynamics disappear  
170 when the terms including  $k_5$  (C8 activated by RIP1),  $k_7$  (RIP3 activated by RIP1), and  $k_9$  (RIP3  
171 inhibited by C8) are respectively set to 0, while BE dynamics are still observed when the other six  
172 terms are fixed to 0. We introduced the coefficient  $H$ , which is defined as  $H = (pRIP3_{Peak} -$   
173  $pRIP3_{RIP1\_100\%}) / pRIP3_{tot}$  to quantify the scale of biphasic dynamics.  $pRIP3_{Peak}$  is the maximum  
174 level of pRIP3, and  $pRIP3_{RIP1\_100\%}$  is the level of pRIP3 when the expression level of RIP1 is 100%  
175 (wild-type). Therefore, analysis in Figure 2B indicates that the essential topology for necroptosis  
176 BE dynamics of the TNF-induced death circuit is constituted by the incoherent feedforward loop  
177 structure ( $k_5$ ,  $k_7$ , and  $k_9$ ) that are embedded in the three nodes (RIP1, RIP3, and C8).

178 Besides the identified RIP1-RIP3-C8 topological structure for BE dynamics, the interaction  
179 term required for achieving the coexistence mode of necroptosis and apoptosis is further explored  
180 based on potential landscape analysis. We respectively removed the terms besides the identified  
181 essential topology for BE dynamics to determine whether apoptosis and necroptosis states could  
182 coexist with RIP1 variation. As shown in Figure 2C, only when the term of RIP1 activated by pRIP3  
183 ( $k_3$ ) is removed (Figure 2Ciii), the system presents solely one potential well with high C8 and low  
184 pRIP3 level. While the system still exhibits two coexisting wells with the blockage of other terms.  
185 Taken together, as the diagram shown in Figure 2D, RIP1-RIP3-C8 incoherent feedforward loop  
186 embedded with the positive feedback of RIP3 to RIP1 is the core topological structure for achieving  
187 RIP1-induced necroptosis BEC dynamics.

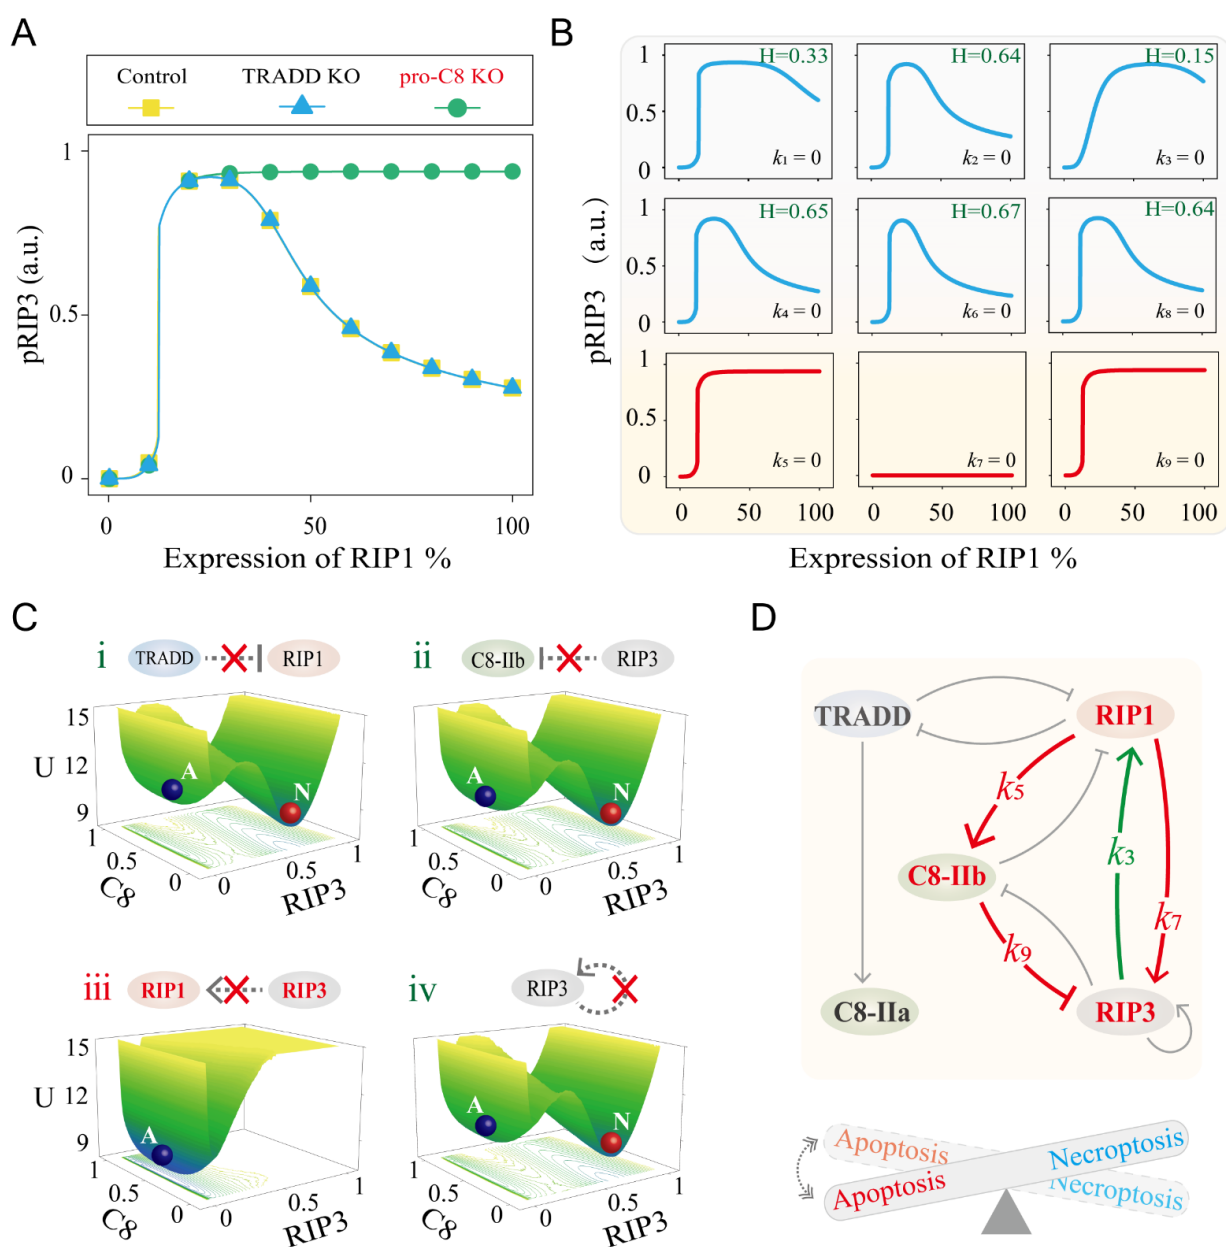

**Figure 2. Identification of the core structure for pRIP3/necroptosis BEC dynamics.** (A)

Comparison of pRIP3 BE dynamics under control, TRADD KO, and C8 KO conditions. (B) The

dynamics of pRIP3 when any one of the nine interaction terms in circuit model is removed,

respectively. (C) Potential landscapes of the system when the four interaction terms are severally

removed. (D) Summary of the constituents and terms that can achieve BE dynamics (red lines) with

coexistent death mode (green line).

## 197 **Bell-shaped regulation of necroptosis biphasic dynamics by RIP3 and the feedforward terms**

198 Having identified the essential topological structure, we next explored the control mechanism of  
199 how necroptosis biphasic dynamics is generated and regulated by the protein nodes (RIP3, TRADD,  
200 and C8) and interaction terms. Both the absolute and relative levels of  $pRIP3_{Peak}$  and  $pRIP3_{RIP1\_100\%}$   
201 to RIP3 expression level variation are shown in Figure 3A. The absolute level of  $pRIP3_{Peak}$  is  
202 linearly positively correlated with RIP3 (upper left panel of Figure 3A), whereas the relative level  
203 of  $pRIP3_{Peak}$  ( $pRIP3_{Peak}/RIP3_{tot}$ ) remains constant, presenting a scale-free feature (upper right panel  
204 of Figure 3A). For  $pRIP3_{RIP1\_100\%}$ , the absolute level is also positively related to RIP3, but the  
205 relative level exhibits a biphasic behavior (down panel of Figure 3A). The scale-free feature of  
206  $pRIP3_{Peak}$  and biphasic behavior of  $pRIP3_{RIP1\_100\%}$  result in the biphasic dynamics of RIP3 presents  
207 inverted Bell-shaped responses to RIP3 expression level, as the quantified scale of biphasic  
208 dynamics H shown in Figure 3B. Four-Parameter Logistic Function is considered for a piecewise  
209 fit of H. When RIP3 is lower than ~10%, H decreases monotonically from the maximum value of  
210 0.44 to 0.18, and the decline rate is the largest at ~5%. Conversely, H is positively correlated with  
211 RIP3 when RIP3 is higher than ~10%. The fitted function suggests that the maximum value of H  
212 cannot exceed 0.72 with a maximum increase rate at ~40%.

213 To systematically reveal the Bell-shaped regulation mechanism of RIP3 on the scale of H, the  
214 variation of relative pRIP3 ( $pRIP3/RIP3_{tot}$ ) is investigated in RIP3-RIP1 phase plane (Figure 3C).  
215 The plane can be divided into 5 regions with specific regulatory mechanisms. Region 1 indicates  
216 that the inhibition of TRADD on RIP1 is dominant and RIP3 remains inactive with low expression  
217 level of RIP1 (Figure 3Di). When RIP1 increases to a critical level, RIP1 activated RIP3 and the  
218 self-activation of RIP3 induce the emergence of pRIP3 (Figure 3Dii), corresponding to region 2.  
219 Regions 3, 4, and 5 show that high level of RIP1 negatively regulates pRIP3. In region 3 with the  
220 low expression level of RIP3, pRIP3 is greatly restrained by C8 (Figure 3Diii), exhibiting a large  
221 value of H. As the expression level of RIP3 increases in region 4, inhibition of pRIP3 on C8

222 gradually becomes dominant (Figure 3Div). pRIP3 level increases and H decreases. Further  
223 increase of RIP3 in region 5 enhances the positive feedback of pRIP3 on RIP1, which indirectly  
224 promotes the inhibition of C8 on pRIP3 (Figure 3Dv), resulting in a resurgence of the large scale  
225 of biphasic dynamics (large value of H). We confirmed the inferences though respectively reducing  
226 the strength of the corresponding interaction terms, which characterize the mutual inhibition  
227 between C8 and pRIP3, and the positive feedback of pRIP3 on RIP1 (Figure S1A). Specifically,  
228 when the strength of C8 inhibition on RIP3 ( $k_6$ ) decreases, region 3 disappears and the relative level  
229 of pRIP3 in region 5 increases. While weakening the inhibition strength of pRIP3 on C8 ( $k_9$ ) results  
230 in the disappearance of region 4 and the expansion of region 3. Attenuating the positive feedback  
231 strength of pRIP3 on RIP1 ( $k_3$ ) increases the relative level of pRIP3 in region 5. The scale of  
232 biphasic dynamics H is barely influenced by TRADD (Figure S1B), but is gradually enhanced with  
233 the increase of C8 (Figure S1C). For C8, the relative  $pRIP3_{Peak}$  also presents a scale-free feature,  
234 while the relative  $pRIP3_{RIP1\_100\%}$  is linearly decreased with the increase of C8.

235 We next investigated the role of interaction terms in mediating the scale of biphasic dynamics  
236 H. Among the nine terms, only  $k_5$  (C8 activated by RIP1) and  $k_7$  (RIP3 activated by RIP1) that  
237 involves in the RIP1-RIP3-C8 incoherent feedforward loop, can both mediate the levels of  
238  $pRIP3_{Peak}$  and  $pRIP3_{RIP1\_100\%}$ , achieving Bell-shaped regulation on H (Figure 3E and S2). With the  
239 increase of  $k_5$ ,  $pRIP3_{Peak}$  decreases first slow and then fast, while  $pRIP3_{RIP1\_100\%}$  decreases first fast  
240 and then slow, presenting distinct responses (Figure 3E). In contrast, increase of  $k_7$  makes  $pRIP3_{Peak}$   
241 to increase first fast and then slow, but  $pRIP3_{RIP1\_100\%}$  to increase first slow and then fast. The scale  
242 H is the largest when the change rate of  $pRIP3_{Peak}$  and  $pRIP3_{RIP1\_100\%}$  are equal with the  
243 corresponding strengths  $k_5=10^{-0.24}$  and  $k_7=10^{0.28}$ .  $pRIP3_{Peak}$  can hardly be regulated by the rest seven  
244 terms, while  $pRIP3_{RIP1\_100\%}$  is positively regulated by  $k_6$  and negatively regulated by  $k_1$ ,  $k_3$ , and  $k_9$   
245 (Figure S2A). Further two-parameters phase plane analysis indicates that the maximum value of H  
246 is 0.68 when  $k_5=0.575$  and  $k_7=1.82$  (Figure 3F). We severally profiled  $pRIP3_{Peak}$  and  $pRIP3_{RIP1\_100\%}$

247 in the  $k_5$ - $k_7$  phase plane (Figure S3A), and three different regions and two processes are identified  
248 in the plane to reveal the mechanism of Bell-shaped regulation (Figure S3B). Although the term of  
249  $k_9$  (inhibition of C8 on pRIP3) that involves in the RIP1-RIP3-C8 incoherent feedforward loop can  
250 not drive Bell-shaped regulation on H,  $k_9$  significantly amplifies the Bell-shaped regulation of  $k_5$   
251 (C8 activated by RIP1) or  $k_7$  (RIP3 activated by RIP1) on H (Figure S3C).

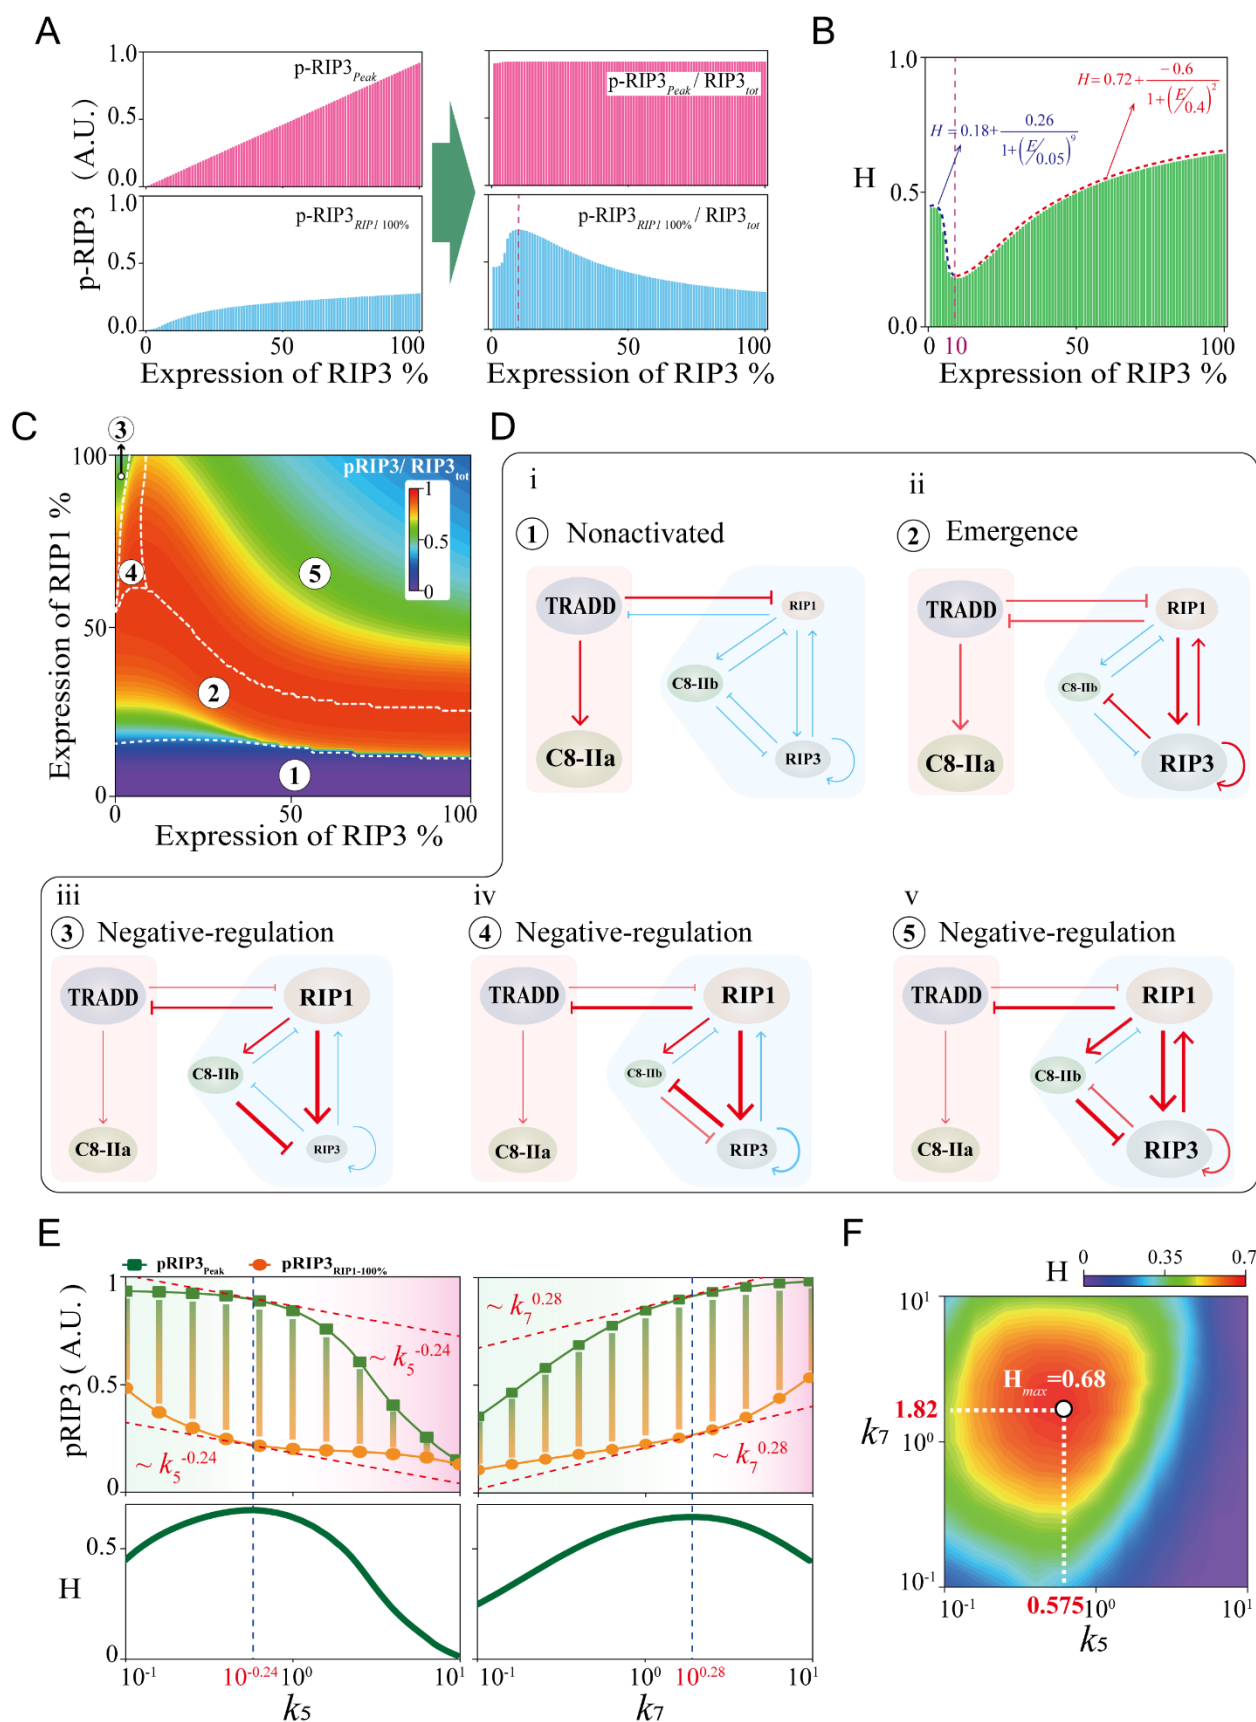



253 **Figure 3. Scale-free emergence of pRIP3 and Bell-shaped regulation of necroptosis biphasic**  
254 **dynamics.** (A) The variation of absolute and relative levels of  $pRIP3_{Peak}$  and  $pRIP3_{RIP1_{100\%}}$  with  
255 RIP3 expression level increases. (B) The quantified scale H of pRIP3 biphasic dynamics. (C) The  
256 relative level of pRIP3 in the RIP3-RIP1 phase plane, giving the plane divided into 5 regions. (D)  
257 Topological analysis of the regulatory mechanisms of the 5 regions in (C). (E) Analysis of the  $k_5$   
258 and  $k_7$  Bell-shaped regulation on pRIP3 biphasic dynamics. (F) Phase diagram of H in  $k_5$ - $k_7$   
259 parameter spaces.

260

### 261 **Shannon entropy quantifies uncertainty of the coexistence death modes**

262 Previous studies attempted to infer the information for thermodynamic quantities by observing  
263 dwell time distribution of transitions among multiple steady states<sup>34-37</sup>. The cell death signaling  
264 presents coexistent dynamics with proper RIP1 level, as the two basins (apoptosis and necroptosis)  
265 shown in the death landscape topography (Figure 1G). To measure the uncertainty of cell fate  
266 decision, we introduced Shannon entropy to estimate entropy production, which is defined as  $S = -$   
267  $\sum p_i \log_2(p_i)$ .  $p_i$  is the probability of the  $i$ -th death mode, and  $i$  represents the state of apoptosis or  
268 necroptosis.  $S$  characterizes the degree of disorder of the cell death system. The larger the value of  
269  $S$  is, the more disorder the system is. Figure 4A illustrates the analysis procedure for Shannon  
270 entropy by calculating dwell time distribution. Stochastic cell death system is obtained by adding  
271 Gaussian white noise to the deterministic system with random initial states. Temporal dynamics of  
272 the system are precisely recorded at the free degrees of pRIP3 to obtain the dwell time distribution  
273 of the system in different states. With the increase of RIP1, the dwell time in apoptosis state is  
274 gradually decreased, but is increased in necroptosis state (Figure 4B, upper panel), and the  
275 corresponding dwell time distributions are shown as well (Figure 4B, down panel).

276 Shannon entropy of  $k_5$  (term of C8 activated by RIP1 that exhibits Bell-shaped regulation on  
277 necroptosis biphasic dynamics) in regulating RIP1-dependent coexistent dynamics is measured

278 (Figure 4C). The region surrounded by the white dotted line is the coexistence transition region.  
279 The color code in the transition region indicates the degree of transition between apoptosis and  
280 necroptosis of the system. The system presents a highly disordered state when RIP1 is near the level  
281 to induce pRIP3/necroptosis emergent dynamics. Shannon entropy (S) gradually decreases and  
282 necroptosis becomes dominated with further increase of RIP1. Thus, the cell fate switches from  
283 ordered apoptosis to highly disordered and finally to ordered necroptosis with the increase of RIP1.  
284 A more intuitive potential landscape topography transition is shown in Figure 4D when  $k_5$  is fixed  
285 at the standard value of 0.3. With the increase of RIP1, the depth of the apoptosis basin is gradually  
286 decreased, while the necroptosis basin is increased, suggesting that RIP1 biases the cell fate towards  
287 necroptosis. The transitions of Shannon entropy and potential landscape topography with different  
288  $k_5$  are also investigated with RIP1 is fixed at 11% (Figure 4E). In contrast to RIP1, increase of  $k_5$   
289 results in the uncertainty of cell fate switches from highly disordered to ordered apoptosis, giving  
290 the depth of apoptosis basin increased and necroptosis basin decreased. The entropy result also  
291 reveals that the increase of  $k_5$  causes a high level demand for RIP1 to trigger pRIP3 emergent  
292 dynamics (white arrow in Figure 4C). The larger the value of  $k_5$  is, the higher RIP1 level is required  
293 for inducing necroptosis emergent dynamics.

294 Therefore, acting as the driving force, RIP1 makes the system dynamics like a “seesaw”  
295 (Figure 4F). The system exclusively executes apoptosis at low RIP1 level. Increase of RIP1  
296 significantly elevates pRIP3 level and entropy production. The death system is highly disordered  
297 and will selectively undergo apoptosis or necroptosis, depending on the initial conditions. High  
298 level of RIP1 reduces entropy production and drives the system to ordered necroptosis. RIP1-  
299 dependent coexistent dynamics regulated by the other three reactions within the identified essential  
300 topological structure (Figure 2D) are shown in Figure S4, indicating that the terms of  $k_3$  (RIP1  
301 activated by pRIP3) and  $k_7$  (RIP3 activated by RIP1) can efficiently switch death modes, while the  
302 system remains highly disordered with the variation of  $k_9$  (inhibition of C8 on pRIP3).

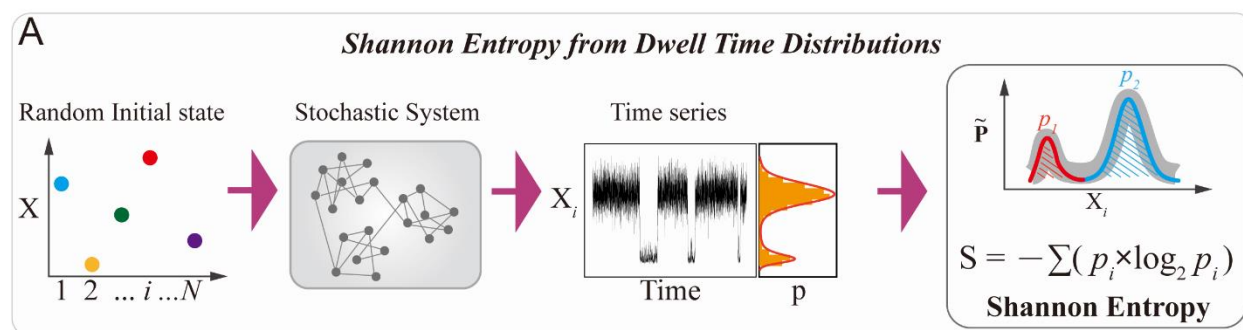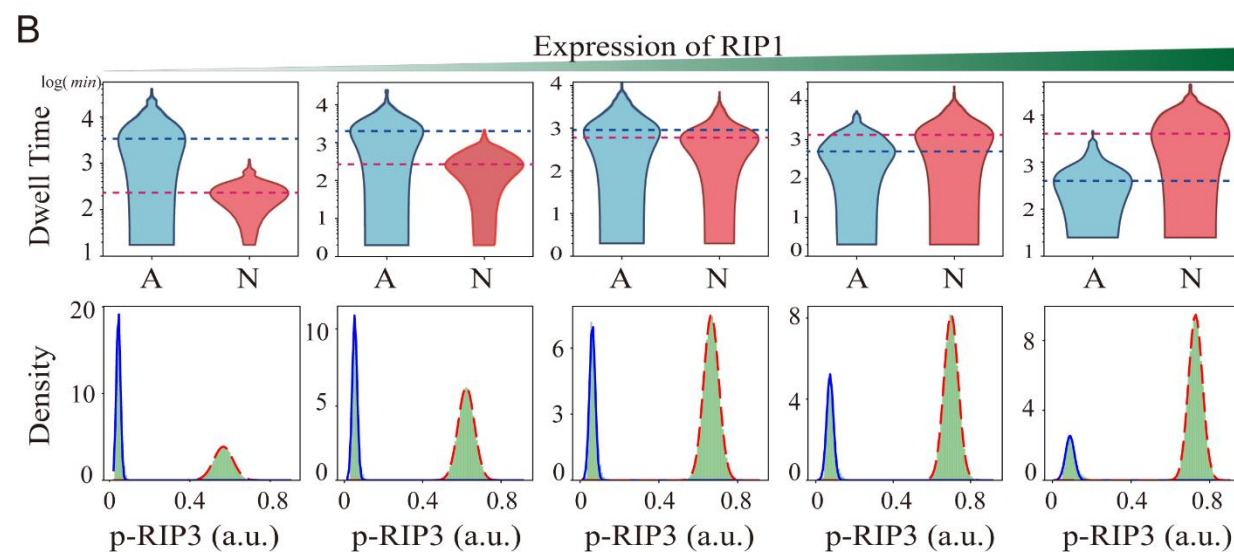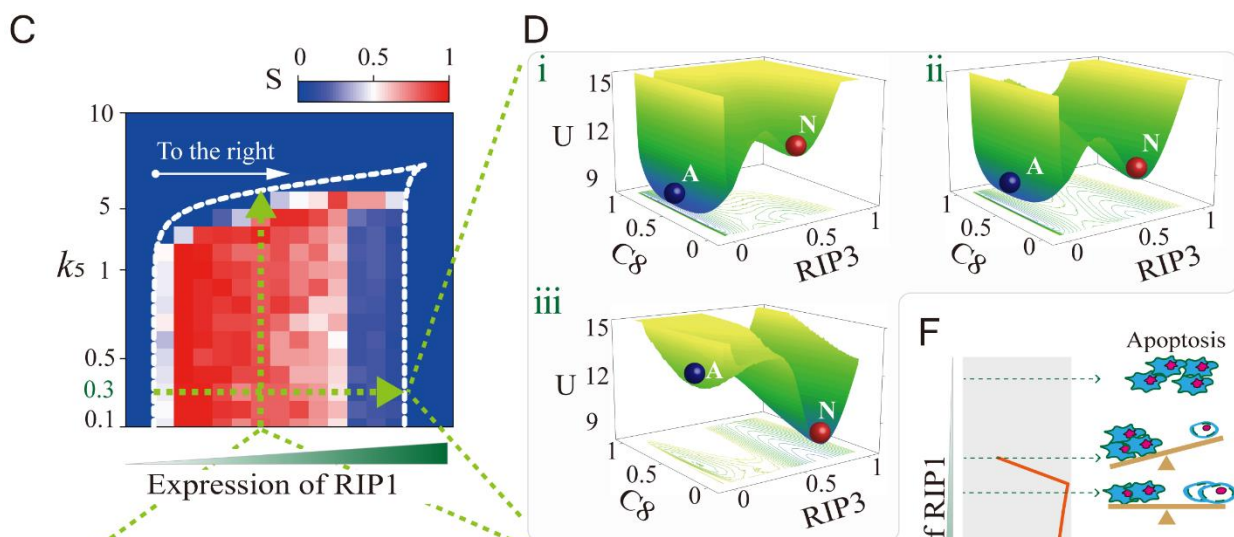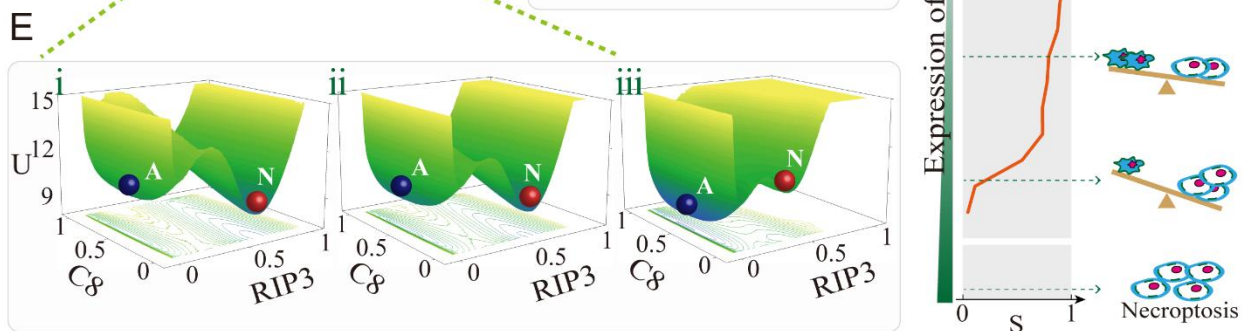

303

304

305 **Figure 4. Shannon entropy quantifies the uncertainty of cell fate decisions.** (A) Illustration of  
306 the calculation procedure of Shannon entropy with dwell time distribution. (B) Statistics and  
307 distribution of dwell time under five representative RIP1 expression levels at the free degrees of  
308 pRIP3. (C) The quantified Shannon entropy of  $k_5$  in regulating RIP1-dependent coexistent  
309 dynamics. (D) and (E) The potential landscape topography of coexistent death modes with  $k_5=0.3$ ,  
310 and RIP1 level at 10%, 11%, and 12.5% respectively (D), and the level of RIP1 at 11% with  $k_5=0.1$ ,  
311 0.5, and 0.7 respectively (E). (F) Shannon entropy characterizes the uncertainty of cell fate, and a  
312 diagram of “seesaw” that reflects the death modes decision under different RIP1 levels.

313

#### 314 **Random circuit analysis identifies two core topologies for necroptosis BEC dynamics**

##### 315 **induction**

316 To avoid the fortuity of deterministic model with specific parameters, random circuit analysis is  
317 further performed to identify the core topology for necroptosis BEC dynamics. Latin hypercube  
318 sampling is used to obtain uniform random parameter regimes within reasonable biological  
319 interval<sup>4,12,38</sup>, and all parameter regimes that can achieve BE, and BEC dynamics are screened  
320 (Figure 5A). We assumed that the biphasic dynamics (BD) of pRIP3 satisfies  $pRIP3_{Peak}$  is higher  
321 than  $pRIP3_{RIP1\_100\%}$  by more than 1%, *i.e.*, BD is defined when  $BD=(pRIP3_{Peak} -$   
322  $pRIP3_{RIP1\_100\%})/pRIP3_{Peak} \geq 1\%$ . Since pRIP3 presents an abrupt and large increase at low level of  
323 RIP1 (Figure 2A), emergent dynamics (ED) is also considered through satisfying pRIP3 is  
324 increased by more than 50% when RIP1 continuously increases by 10% ( $ED=\Delta pRIP3/\Delta RIP1 \geq 5$ ).

325 The probabilities under five representative RIP3 expression levels are firstly calculated, and  
326 50,000 groups of random samples are taken for each RIP3 level. The probabilities of achieving BE  
327 dynamics (blue histograms) and BEC dynamics (green histograms) are presented in Figure 5B. As  
328 the result indicated, the vast majority (~86.6%) of samples that achieve BE also have coexistent  
329 dynamics, revealing that the necroptosis BE dynamics is highly related to coexistence of death

330 mode. The probabilities of BE and BEC dynamics decrease monotonically with RIP3 decreases.  
331 The probability of only considering biphasic dynamics is decreased by 17% when RIP3 decreases  
332 to 20% (Figure S5A). Whereas, the probability of BEC dynamics is decreased by 41.6% (Figure  
333 5B). Thus, compared to biphasic, RIP3 seems to be more critical for the achievement of emergent  
334 and coexistent dynamics.

335 To determine the regulation of RIP3 on the scale of biphasic dynamics H, 570 samples that  
336 achieve BEC dynamics for 100% RIP3 are selected. The regulation of H by RIP3 has three types  
337 and their corresponding proportions are calculated: negative regulation (H is decreased with RIP3  
338 increases) with 16.49%, positive regulation (H is increased with RIP3 increases) with 54.74%, and  
339 Bell-shaped regulation (nonlinear change in H with RIP3 increase) with 28.77% (Figure 5C). Three  
340 specific systems are further selected to intuitively show how RIP3 negatively, positively, or  
341 nonlinearly regulates H (Figure 5D, upper and middle panels). Another specific system is also  
342 selected to present the death mode transitions from apoptosis to the coexistence of apoptosis and  
343 necroptosis, and finally to the exclusive necroptosis state with the increase of RIP1 (Figure 5D,  
344 down panel).

345 Similar regulation of C8 on H is shown in Figure S5B, where the proportion of systems that  
346 achieving Bell-shaped regulation of H by C8 is less than ~10% compared to the regulation of RIP3  
347 on H (Figure 5C). Thus, variation of RIP3 seems to be more easily than C8 to achieve Bell-shaped  
348 regulation on H, supporting the results in the deterministic system that H does not present Bell-  
349 shaped response to C8 variation (Figure S1C). The average and variation of  $pRIP3_{peak}$  with the  
350 decrease of RIP3 or C8 in the 570 systems are calculated as well (Figure 5E). The average of relative  
351  $pRIP3_{peak}$  is concentrated at a high level and the variation is quite small, revealing that the scale-  
352 free feature of necroptosis emergence (Figure 3A) is an intrinsic topological property of the death  
353 circuit.

354 The essential module for achieving BE and BEC dynamics are discussed with random circuit  
355 analysis as well. The interaction terms are completely blocked one by one in the 50,000 random  
356 samples, and the statistical probabilities are shown in Figure 5F. Only when any one of the terms  
357 ( $k_5$ ,  $k_7$ , or  $k_9$ ) is removed, the probability tends to be 0, suggesting that the RIP1-RIP3-C8 incoherent  
358 feedforward loop is the necessary module to generate BE and BEC dynamics (Figure 5F and Figure  
359 S5C). Positive feedback loop is proven to be necessary for coexistent dynamics<sup>39-41</sup>. Unlike the  
360 deterministic system (Figure 2C), blocking the positive feedback of RIP3 to RIP1 ( $k_3$ ) cannot arrest  
361 coexistent dynamics (Figure 5F). While the probability of BEC is significantly decreased compared  
362 to BE with the blockage of RIP3 self-activation ( $k_3$ ). The contributions of all the four positive  
363 feedback loops within the death circuit are studied (Figure S5D), revealing that only the positive  
364 feedback loop formed by  $k_3$  or  $k_8$  is efficient for achieving the high occurrence probability of  
365 coexistent dynamics.

366 The regulation strategies of H by all the circuit interaction terms are separately calculated  
367 (Figures 5F and S5E). Consistent with deterministic system analysis (Figure 3E), the Bell-shaped  
368 regulation of H by the two feedforward terms of  $k_5$  and  $k_7$  are also statistically confirmed (Figure  
369 5F). Moreover, RIP3 self-activation term  $k_8$  can also present Bell-shaped regulation on H, which is  
370 not observed in the deterministic system (Figure S2B). Thus, besides the positive feedback of RIP3  
371 to RIP1 (Figures 5Gi and 2D), RIP3 self-activation forms another positive feedback for efficiently  
372 achieving coexistent dynamics and the Bell-shaped regulation on necroptosis biphasic dynamics  
373 (Figure 5Gii). The RIP1-RIP3-C8 incoherent feedforward loop embedded with these two positive  
374 feedback loops forms the fundamental hypermotif for robustly achieving BEC dynamics in the  
375 death circuit (Figure 5G).



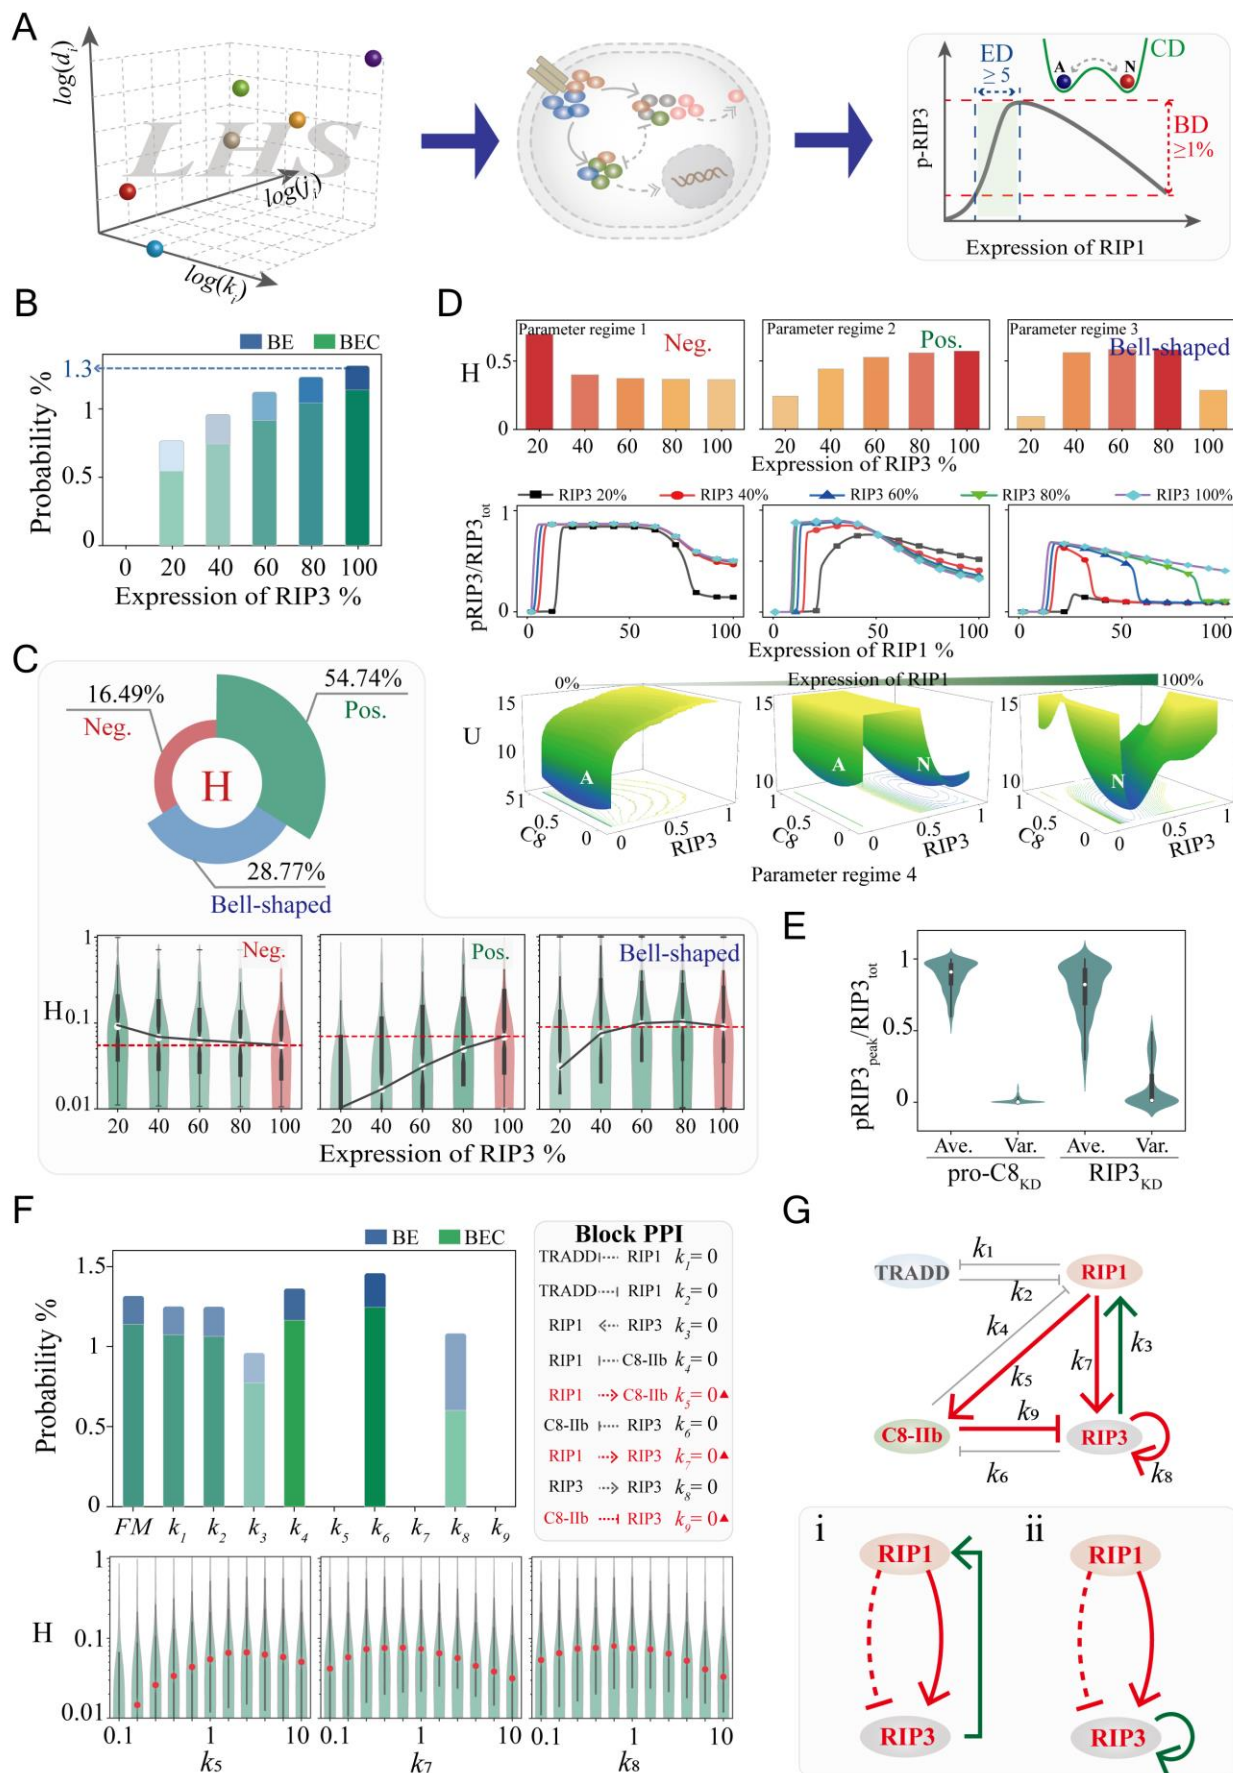



377 **Figure 5. Identifying the core structure for necroptosis BEC dynamics with random circuit**  
378 **analysis.** (A) Schematic of a computational workflow. Left panel: Latin hypercube sampling to  
379 obtain random parameter regimes. Right panel: Threshold settings for screened RIP1-dependent  
380 pRIP3 dynamics, including biphasic, emergent, and coexistent dynamics (BD, ED, and CD). (B)  
381 Random circuit analysis is used to search 50,000 systems under five representative RIP3 expression  
382 levels and count the probabilities that pRIP3 dynamic behaviors satisfy the threshold condition of  
383 BE and BEC dynamics. The blue and green histograms represent the probability of BE and BEC  
384 dynamics, respectively. (C) Statistics of the regulatory behavior of RIP3 on H in the screened  
385 systems with BEC dynamics. (D) Four representative systems of three different regulations of RIP3  
386 on H (parameter regimes 1-3) and RIP1-dependent death modes switching behavior (parameter  
387 regimes 4). (E) The average and variance statistics of pRIP3peak relative level of all the screened  
388 samples with different expression levels of RIP3 and C8. (F) The probabilities of the system  
389 achieving BE (blue histograms) and BEC dynamics (green histograms) when any one term is  
390 removed. The terms of  $k_5$ ,  $k_7$ , and  $k_9$  (marked by red triangles) are individually removed and the  
391 system cannot achieve biphasic dynamics. Down panels: Statistics of terms strength on H in the  
392 screened systems. (G) The components and reactions in the death circuit to achieve BEC dynamics.  
393 Red lines indicate the necessary interaction of the incoherent feedforward loop. Green lines indicate  
394 the positive feedback to RIP3.

395

### 396 **Topological exhaustivity defines three minimal circuits to achieve natural BE dynamics**

397 To dissect the hidden design principles in biological systems, we tried to find the minimal circuit  
398 that performs biphasic dynamics with emergence. Topological exhaustive method has been widely  
399 used to explore the design of functional achievement in biological networks<sup>4,16,42-44</sup>. The workflow  
400 for circuit topology to function mapping of BE dynamics is shown in Figure S6A, which presents  
401 the circuit model described by coupling matrices, parameter regimes, and ordinary differential

402 equations. We first examined whether the output signal node in the two-node circuit could achieve  
403 BE dynamics by the variation of the receiving node of input. All the 27 different structures of two-  
404 node circuit are respectively assigned 100,000 sets of random parameter regimes, but none of these  
405 circuits can achieve BE dynamics (Figure S6B).

406 We next searched BE dynamics in the three-node circuit, which includes an input node (node-  
407 A), an output node (node-C), and a regulatory node (node-B) (Figure 6A). There are three types of  
408 term (promotion, inhibition, and no interaction) between any two nodes. To map out the entire  
409 design space of three-node circuits capable of BE dynamics, all the 4,698 circuits are exhausted  
410 and analyzed with 50,000 sets of random parameter regimes assigned to each circuit. A total of  
411 234.9 million dynamical systems ( $4,698 \times 50,000$  parameter regimes) are analyzed and finally 1,701  
412 circuits that can achieve BE dynamics are screened out. To quantify the volume of the parameter  
413 space in which circuit supports BE dynamics, the 4,698 coupling matrices are firstly reduced to  
414 two-dimensional space using *t-SNE* method<sup>45</sup>, and then the probabilities are converted into  
415 topological potentials through  $-\ln(p)$  analogy to the Boltzmann relation (Figure 6B). As a result, the  
416 three potential wells in the topological landscape correspond to three sub-clusters respectively. The  
417 three minimal circuits (M1, M2, and M3) in each sub-cluster are shown in Figure 6C, indicating  
418 that the circuits have the common feature of containing incoherent feedforward loop. Similar results  
419 are obtained with clustering analysis using the pair-wise distance between circuits, which also  
420 divides the 1,701 circuits into three sub-clusters and finally refers to the same three minimal circuits  
421 (Figure S7A).

422 Then, we severally segmented the obtained probabilities of the three sub-clusters into the two-  
423 dimensional space of biphasic and emergent dynamics (Figure 6D). Probability distributions of the  
424 three sub-clusters are quite different in the scale space. The sub-cluster of M1 circuit has a high  
425 probability occurrence with a large scale of biphasic dynamics but with a low scale of emergent  
426 dynamics (red square). While the sub-cluster of M2 circuit prefers to achieve a middle scale of

427 biphasic dynamics but with a small or high scale of emergent dynamics (red and orange squares).  
428 M3 circuit sub-cluster is concentrated on attaining a small scale of biphasic dynamics, but with a  
429 high scale of emergent dynamics (red square). Therefore, despite containing the incoherent  
430 feedforward loop, the three minimal circuits exhibit divergence scales for achieving BE dynamics,  
431 providing potential diversity control strategies in regulating various biological functions.

432 Starting from the three minimal circuits, the 1,701 circuits that can achieve BE dynamics are  
433 generated by adding edges one by one. As a result, a comprehensive atlas describing the topological  
434 evolution of three-node circuits and their corresponding probabilities for achieving BE dynamics  
435 are entirely presented in Figure 6E. The topological complexity (the number of interaction  
436 terms/edges  $E$ ) of the atlas increases from bottom to top, and the probability of a circuit of the same  
437 complexity to achieve BE dynamics decreases from left to right. The connectivity in the global atlas  
438 of topological evolution could supervise any one interaction to enhance or resist the circuit  
439 fulfillment function.

440 If an added edge improves the probability for achieving BE dynamics of the minimal circuit,  
441 such an edge is functionally significant<sup>38,46</sup>. The statistical result of stochastically adding edges to  
442 improve the probability of achieving BE dynamics based on the minimum motif M1 is shown in  
443 Figure 6F. The result indicates that adding the self-activation of node C significantly increases the  
444 probability for inducing BE dynamics. The probability is decreased by adding inhibition, but is  
445 increased through considering the promotion of node C on node A. Based on the structure of adding  
446 node C self-activation and the promotion of node C on node A, the probability reaches the highest  
447 while further considering the inhibition of node B on node A and self-inhibition of node B in M1.  
448 Positive feedback loop is proved to play decisive roles for realizing multi-stable states in biological  
449 systems<sup>39-41</sup>. To discuss the structure of M1 for robustly achieving coexistent dynamics, six terms  
450 which could form positive feedback loops in motif M1, are individually (diagonal node) or  
451 integratively (non-diagonal node) added (Figure 6G). The proportion of the system with BEC

452 dynamics based on the achieved BE dynamics system is calculated, showing that the contribution  
453 of node C self-activation is significant, and the proportion of system with coexistent dynamics is  
454 the highest when the promotion of node C on node-A is added.

455 Taken together, for robustly achieving BEC dynamics, the structure shown in Figure 6H  
456 should be the optimal circuit topology for M1, where red lines represent the essential edges while  
457 blue lines are the regulatory edges. Actually, the experimentally determined RIP1-RIP3-C8 circuit  
458 (Figure 1B) is highly consistent with the screened optimal circuit, revealing the precise design  
459 strategy of the biological system in controlling cell death. The optimal structure for circuits M2 and  
460 M3 are also discussed and the corresponding results are shown in Figures S7B and S7C.

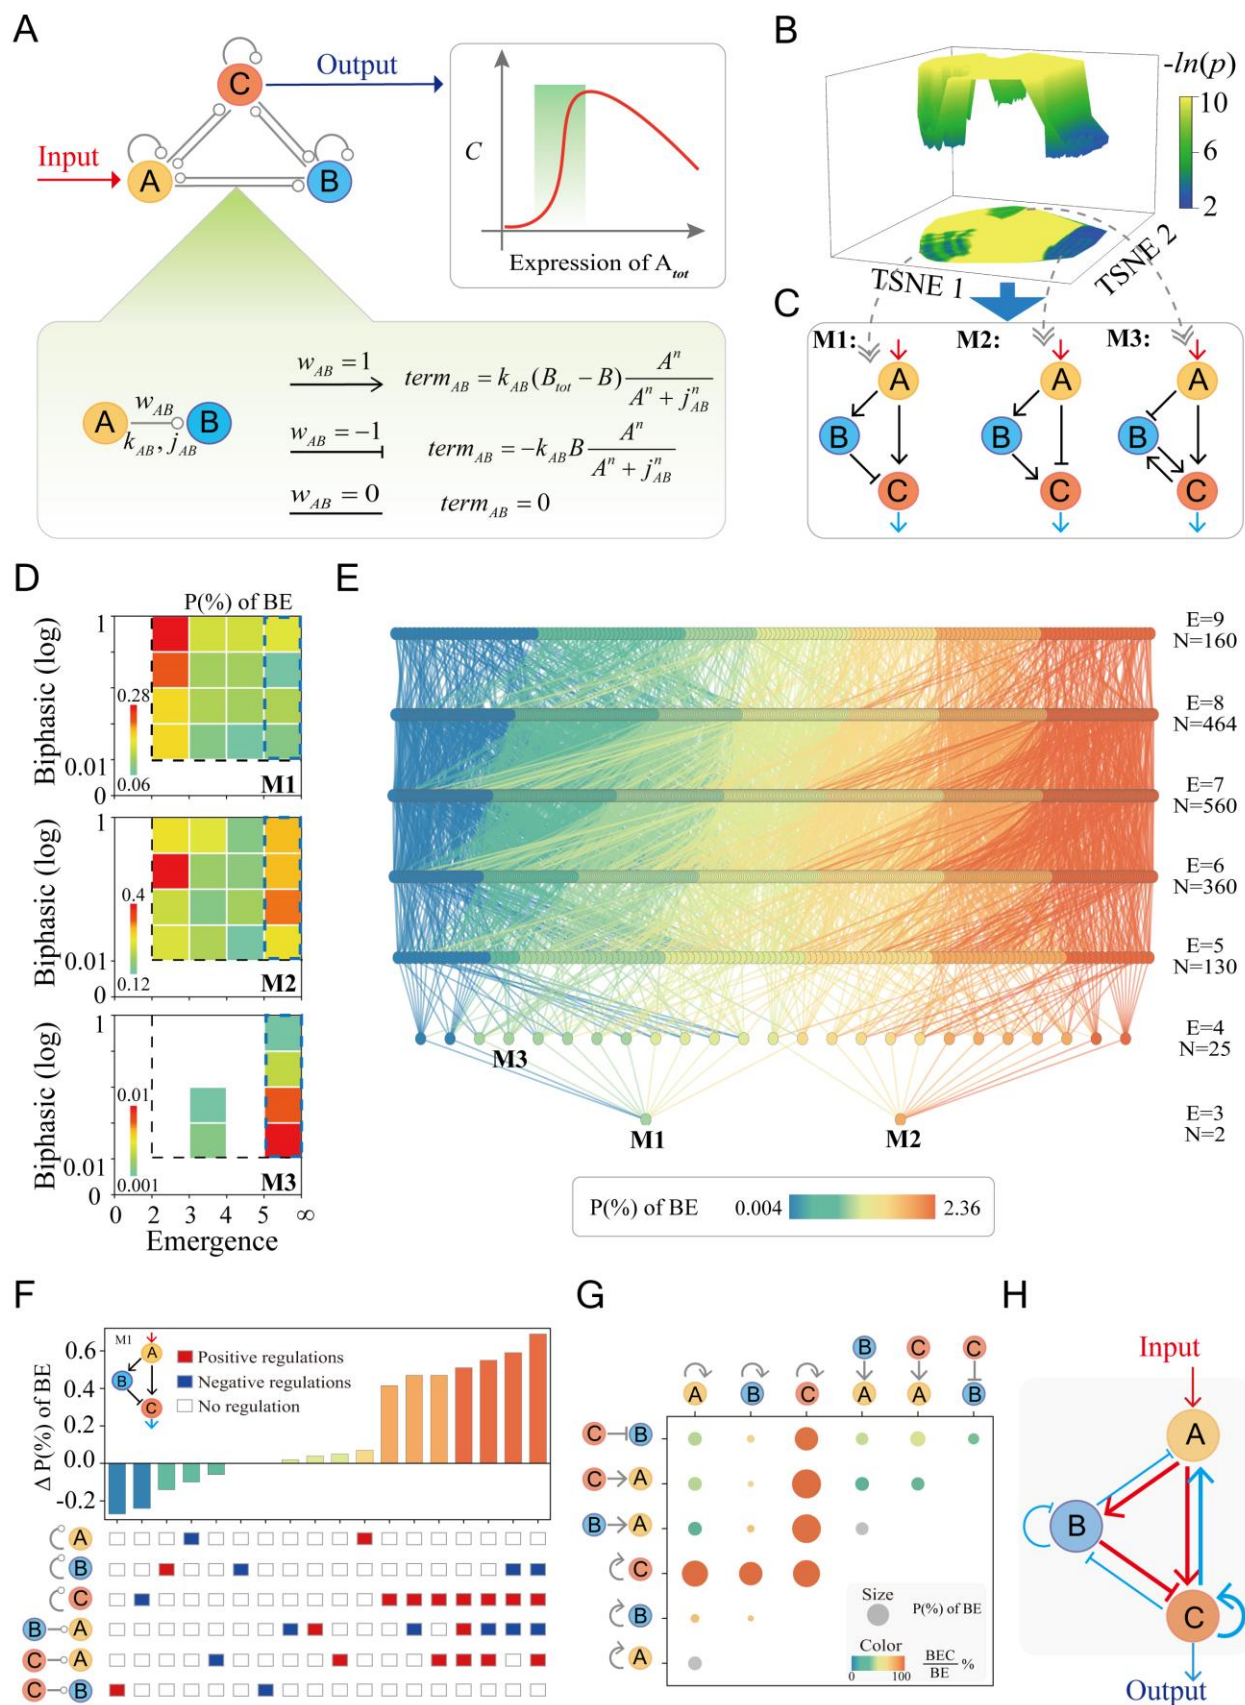

462 **Figure 6. Topological exhaustive method reveals a complete atlas of achieving BE dynamics**

463 **in three-node circuit.** (A) Illustration of the structure screening procedure from mapping topology

464 to function of asymmetric directed three-node circuit. A, B and C are the input node, regulatory

465 node, and output node, respectively. There are three kinds of edges between any two nodes,  $w = 1$

466 means promotion,  $w = -1$  means inhibition, and  $w = 0$  means no interaction. (B) Topological

467 landscape of 4,698 coupling matrices in a 2D topological space. The well depth represents the

468 probability of a sub-cluster achieving BE dynamics. (C) The minimal circuit of the sub-clusters that

469 corresponds to the three wells in the topological landscape. (D) Probability distributions of the three

470 minimum circuits are mapped into the biphasic dynamics and emergence 2D scale spaces. (E) A

471 global atlas of 1,701 circuits that enable topological evolution of three-node circuits for achieving

472 BE dynamics. (F) Probability statistics of BE dynamics that can be achieved by adding edges based

473 on circuit M1. (G) The proportions of systems that with BEC dynamics when the six positive

474 feedback edges are added to M1 individually (diagonal node) or in combination (non-diagonal

475 node). (H) The determined optimal circuit for robustly achieving BEC dynamics.

476  
477 **Discussion**

478 Crosstalk between pathways is easy to understand, but why a given end-result is eventually reached

479 is often a puzzle. As a key molecule in TNF signaling, RIP1 is required for inducing necroptosis<sup>47</sup>.

480 While the inhibitory function of RIP1 is also demonstrated in mouse genetic studies<sup>48,49</sup>. How RIP1

481 regulates dynamics of downstream substrates in determining specific cell death outcomes is a long-

482 standing question<sup>50,51</sup>. We previously quantified the RIP1-induced biphasic dynamics of

483 necroptosis and further deciphered the control mechanisms<sup>12</sup>. However, the complexity of the

484 system and large number of parameters involved in previous model limit the generalizability of

485 conclusions and obscure the underlying mechanisms. To determine the topology and regulatory

486 mechanism for necroptosis biphasic, emergent, and coexistent dynamics, we proposed a circuit cell



487 death model of the TNF signaling based on previous studies<sup>12</sup> and our experimental data (Figure 1).  
 488 RIP1-RIP3-C8 incoherent feedforward loop is determined for achieving biphasic dynamics with  
 489 emergence, while the positive feedback loop of RIP3 on RIP1 is required for death mode  
 490 coexistence (Figure 2D). Instead of exploring the mechanisms with specific models, random  
 491 parameter analysis of the TNF circuit is also performed, identifying that the incoherent feedforward  
 492 loop embedded with RIP3 self-activation is another effective structure for achieving BEC dynamics  
 493 (Figure 5G). We attempted to explore whether there exist general circuit design principles for  
 494 natural systems to execute BE dynamics by using the topological landscape (Figure 6B), bottom-  
 495 up, and topological evolution (Figure 6E) strategies. Both two- and three-node circuits are  
 496 systematically analyzed and only three minimal three-node circuits are identified finally,  
 497 confirming that the incoherent feedforward loop is the essential module for BE dynamics.

498

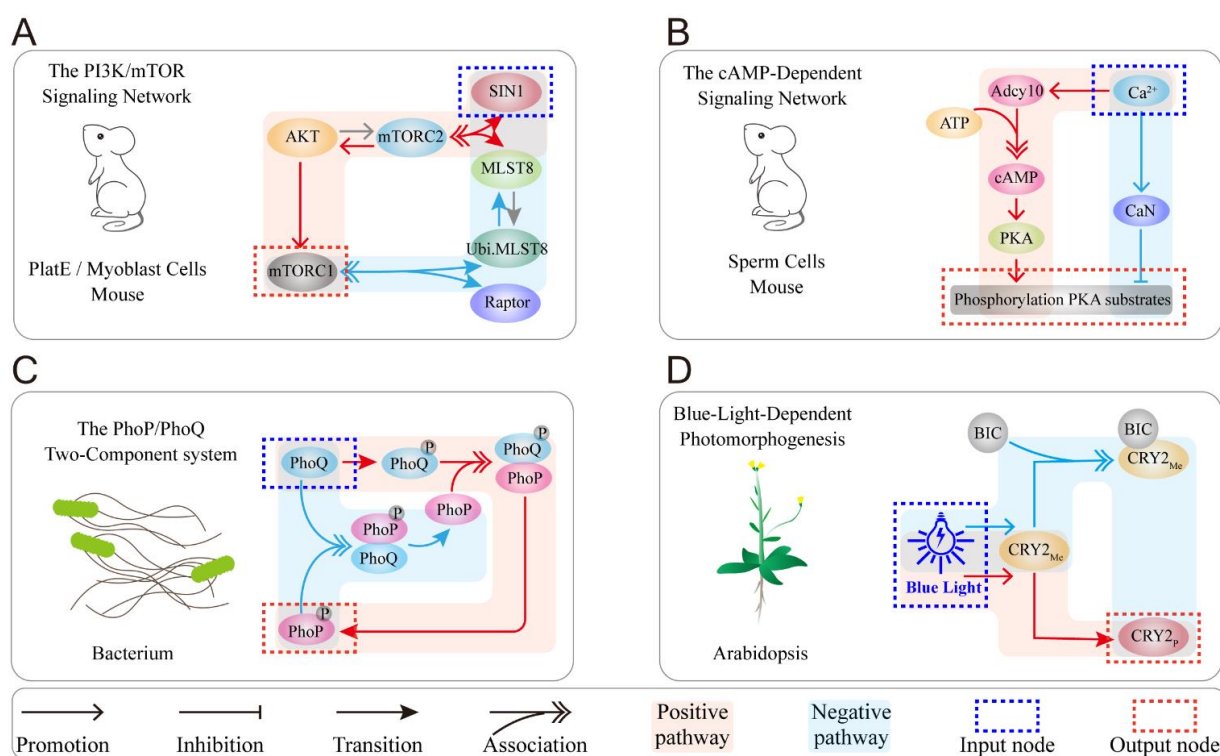

499

500 **Figure 7. Examples of biphasic dynamics induced by incoherent feedforward loop in various**  
 501 **cell types.** Blue backgrounds represent the negative regulatory pathway, and red backgrounds  
 502 represent the positive regulatory pathway. (A) Biphasic dependence of mTORC1 activity on SIN1



503 in mTOR signaling. (B) Biphasic function of calcium ions in cAMP-dependent signaling. (C) The  
504 dual role of PhoQ in regulating PhoP phosphorylation in bacterial two-component system. (D)  
505 Biphasic response of cryptochrome photoreceptor 2 (CRY2) to photomorphogenesis in Arabidopsis.  
506

507 Biphasic dynamics have been observed to drive essential biological processes in all forms of  
508 life, including mammalian cells, plant cells, and even bacterial cells. Previous study reported that  
509 SIN1, a key mTORC2 subunit, biphasically regulates mTORC1 activity in Myoblast cells<sup>52</sup>. The  
510 dynamics is determined by the incoherent feedforward loop shown in Figure 7A. Low-dose SIN1  
511 promotes mTORC1 by synthesizing mTORC2, whereas high-dose SIN1 over-depletes MLST8  
512 resulting in mTORC1 decreases. Biphasic dynamics is also observed in cAMP signaling which is  
513 triggered by the incoherent feedforward loop<sup>53</sup> (Figure 7B). Calcium ions positively regulate  
514 Adcy10 to promote cAMP synthesis and PKA activation in sperm flagellum, and also inhibit PKA  
515 by activating CaN (calcineurin). Besides the mammalian cells, we previously found the biphasic  
516 dynamics of PhoP phosphorylation regulated by PhoQ in bacteria<sup>7</sup>. The incoherent feedforward  
517 loop exists in the PhoP/PhoQ signaling as well (Figure 7C). On the one hand, PhoQ promotes PhoP  
518 phosphorylation through binding to PhoP. On the other hand, excess unphosphorylated PhoQ also  
519 binds to phosphorylated PhoP to dephosphorylate PhoP. Our former study also observed the  
520 biphasic dynamics of CRY2 controlled by blue light in Arabidopsis<sup>9</sup>, and the incoherent feedback  
521 loop is also hidden in the CRY2 signaling (Figure 7D). With the increase of light intensity, blue  
522 light not only promotes the transition of CRY2<sub>Me</sub> to CRY2<sub>p</sub>, but also promotes the combination of  
523 CRY2<sub>Me</sub> and BIC to form a complex to reduce the level of CRY2<sub>p</sub>. Taken together, the topology of  
524 these signaling networks suggests that our determined incoherent feedforward loop should be a  
525 generalizable design principle for robustly executing biphasic dynamics in biological systems.

526 Despite the complexity and diversity of cell signaling networks, their core module and central  
527 topology should be highly conserved. Understanding the general design principles to achieve

528 specific functions in diverse biological systems is significant. Forward searching all two- or three-  
529 node circuits are effective to find essential structures for achieving functions such as adaptation,  
530 noise-attenuation, robust oscillation, *etc.*<sup>4,16,42</sup>. The biological systems frequently exhibit multi-  
531 functions at the same time. Unlike the previous studies that mainly focused on one or two biological  
532 functions, we identified the topological structure that can achieve three general functions, *i.e.*,  
533 biphasic, emergent, and coexistent dynamics in this work. Among the identified circuits, auxiliary  
534 interaction on M1 motif that increase the probability of functional achievement are consistent with  
535 the experimentally observed RIP1-C8-RIP3 structure (Figures 2D and 6C), suggesting that the  
536 biological systems are naturally optimal structures. Of course, topological exhaustivity is also a  
537 powerful approach for predicting interaction in biological systems that have not been  
538 experimentally observed. In our analysis, the three identified circuits (M1, M2, and M3) seem to  
539 exhibit divergence scales for achieving BE dynamics (Figure 6D). While the intrinsic differences  
540 among these circuits are not captured. Further studies are still needed to systematically compare the  
541 general principles of these incoherent feedforward loops in exerting biological functions.

542 Cell states correspond to the attractors of the dynamical system, while potential landscape  
543 captures the dynamical principles of cell state transitions through providing a global  
544 characterization and stability measurement<sup>54-56</sup>. Potential landscape allows the targeted exploration  
545 of fundamental features and switching strategies of cell fate decision processes, and their  
546 application deepens our understanding of biological functions. Most recently, a new cell-aging fate  
547 induced by overexpression of the lysine deacetylase Sir2 was found by using this approach<sup>57</sup>.  
548 Besides, an unexpected observation of the lineage specifiers that can facilitate reprogramming and  
549 replace reprogramming factors of a corresponding lineage-specifying potential, was successfully  
550 clarified with landscape analysis as well<sup>58</sup>. Here, our study quantitatively provides the stochastic  
551 dynamics, the global nature, and the kinetic transitions of the cell death signaling. This is the first  
552 landscape discussion of necroptosis signaling to investigate the regulation of death mode switching.

553 We systematically explored how the system structure changes the volume of the valleys, potentially  
554 helping to develop therapeutic strategies for death control. However, while employing the  
555 landscape theory, it is still difficult to use Fokker-Planck equation to solve the evolution probability  
556 of high-dimensional complex system. Although it has been proven effective to coarse-grain a high-  
557 dimension system into a low-dimension<sup>59</sup>, the curse of dimensionality exists objectively. Thus, deep  
558 learning method, truncated moment equations, partial self-consistent mean field approximation, and  
559 trajectory density should be developed and further considered in future study<sup>59-62</sup>.

560 For living systems with nonequilibrium multi-stable states, the essence of state switching is  
561 violating the principle of detailed balance that occurs at the cost of increasing entropy<sup>63</sup>. However,  
562 the complexity and only partial accessibility of living systems severely limit the inference of crucial  
563 thermodynamic quantities, like the entropy production. Previous studies mostly considered coarse-  
564 graining as a mapping method to simplify the complex systems to the reduced Markov networks.  
565 Recent studies also sought to measure the rate of entropy production by estimating the probabilities  
566 of forward and reverse trajectories in sufficiently long time series data. These theoretical  
567 explorations provided groundbreaking insights into understanding the central dogma, cells sense  
568 through receptors, and so on<sup>37,64-66</sup>. In this study, Shannon entropy is introduced for the first time  
569 to measure the uncertainty of cell death mode transition. Information entropy presents a possible  
570 paradigm for understanding the transformation of energy and information in cells to perform fate  
571 decisions, and further consideration of the relationship between the information cost and the free  
572 energy cost of nonequilibrium systems is also urgently needed. These analyses will provide novel  
573 insights into the role of ‘Maxwell's demon’ in fate decisions in living systems<sup>67,68</sup>. However, due to  
574 the macroscopic limitation of complex living systems, our work assumes that the state transitions  
575 on the observed degrees of freedom are equivalent to the state transitions of all degrees of freedom  
576 of the system. We cannot determine whether there are other state transitions based on partial

577 observations. The inference of information and energy associations in living systems is still an  
578 obvious and enormous challenge.

579

## 580 **Methods**

### 581 **Cell line and cell culture**

582 Mouse fibrosarcoma L929 were obtained from ATCC. RIP1 KO, RIP3 KO, L929, TRADD  
583 KO and Caspase-8 KO L929 cells were generated by TALEN or CRISPR/Cas9 methods. The  
584 knock-out cells were determined by sequencing of targeted loci and immunoblotting of the  
585 expression of respective proteins. All cells were maintained in Dulbecco's modified Eagle's  
586 medium (DMEM), supplemented with 10% fetal bovine serum, 2 mM L-glutamine, 100 IU  
587 penicillin, and 100 mg/ml streptomycin at 37°C in a humidified incubator containing 5% CO<sub>2</sub>. The  
588 target sites were designed as follows: RIP3: "CTAACATTCTGCTGGA"; RIP1:  
589 "AACCGCGCTGAGTGAGTTGG"; TRADD: "AAGATGGCAGCCGGTCAGAA"; Caspase-8:  
590 "GTGTTCAAATACATACGCCT". All lentiviral-shRNAs were constructed into pLV-H1-EF1 $\alpha$ -  
591 puro vector or pLV-H1TetO-GFP-Bsd following the manufacturer's instruction (Biosettia). The  
592 indicated shRNA target sequences was: RIP1 shRNA: 5'-GCATTGTCCTTTGGGCAAT-3'.

593

### 594 **Reagents and antibodies**

595 Mouse TNF- $\alpha$  were obtained from eBioscience (San Diego, CA, USA). Anti-RIP3 (dilution  
596 1:1,000) and anti-MLKL (dilution 1:1,000) were raised using E. coli-expressed GST-RIP3 (287-  
597 387 amino acid), GST-MLKL (100-200 amino acids) and GST-FADD (full length), respectively.  
598 Anti-caspase-8 antibody (4790, dilution 1:1000) and anti-cleaved caspase-8 antibody (8592,  
599 dilution 1:500) were purchased from Cell Signaling Technology. Anti-p-RIP3 antibody (ab222320,  
600 dilution 1:500) and anti-p-MLKL antibody (ab196436, dilution 1:1,000) were purchased from  
601 Abcam. Anti-Gapdh antibody (60004-1-Ig, dilution 1:2,000) were from Proteintech. Anti-RIP1  
602 antibody (610459, dilution 1:1,000) was from BD Biosciences.

603

604

## 605 **Immunoprecipitation and western blotting**

606 Cells were seeded in a 100 mm dish, grew to reach confluency. After stimulating, cells were  
607 washed by PBS for three times and then lysed with lysis buffer (20 mM Tris-HCl, pH 7.5, 150 mM  
608 NaCl, 1 mM Na<sub>2</sub>EDTA, 1 mM EGTA, 1% Triton X-100, 2.5 mM sodium pyrophosphate, 1 mM  
609  $\beta$ -glycerophosphate, 1 mM Na<sub>3</sub>VO<sub>4</sub>) on ice for 30 min. Cell lysates were then centrifuged at 20,000  
610 g for 30 min. The supernatant was immunoprecipitated with anti-Flag M2 beads at 4°C overnight.  
611 After the immunoprecipitation, the beads were washed three times in lysis buffer and the  
612 immunoprecipitated proteins were subsequently eluted by SDS sample buffer with 0.15  $\mu$ g/ $\mu$ L  
613 3 $\times$ Flag peptide.

614

## 615 **Microscopy imaging of cell death**

616 To examine cell death morphology, cells were treated as indicated in 12-well plates or 35-mm  
617 glass bottom dishes for image capture. Static bright-field images of cells were captured using  
618 Zeiss LSM 780 at room temperature. The pictures were processed using Image J or the ZEN 2012  
619 Image program.

620

## 621 **Noise and potential landscape**

622 There is randomness in the procedure of biochemical reactions in cells, including intrinsic  
623 randomness, that is, molecular noise, and thermal fluctuations in the biochemical environment<sup>69,70</sup>.  
624 For simplicity, we add a noise term,  $\sigma d\xi$ , to the OEDs of the deterministic model and assume that  
625 the noise intensity is correlated with the protein level.  $\xi$  represents for white Gaussian noise, and  
626 the statistical properties satisfy  $\langle \xi_i(t) \rangle = 0$  and  $\langle \xi_i(t) \xi_i(t') \rangle = 2\sigma\delta(t-t')$ .

627 The global dynamics of a stochastic system with noise are given by the potential landscape.  
628 The stochastic dynamics of cell death fate decision system could be characterized by the generalized  
629 Langevin equation  $dx_i(t)/dt = F(x_i) + \xi(t)$ , where  $x$  represents the concentrations of the proteins and

630  $F$  is the driving force. The Fokker-Planck equation describes the evolution of the probability density  
631  $p$  in the state space, as following:  $\partial p(x_i, t)/\partial t = -\Sigma \partial(F(x_i) p(x_i, t))/\partial x_i + D_i \Sigma \partial^2 p(x_i, t)/\partial x_i^2$ . Since the  
632 dimensionality of the model limits the direct access to the probability density through the evolution  
633 of the Fokker-Planck equation. We use the Bernoulli experiment numerical method to replace the  
634 steady-state probability distribution with the trajectory density distribution in the phase space.  
635 Specifically, we divide the two-dimensional phase space of RIP3 and C8 into 200×200 lattices and  
636 assign 10,000 sets of random initial conditions to the stochastic differential equations. After a long  
637 enough evolution, 10,000 trajectories can be obtained in the phase space, and the number of  
638 trajectories in each lattice is counted and the density is calculated<sup>58</sup>.

639

#### 640 **Identification of biphasic dynamics with emergence**

641 In this study, the system depends on normalized TNF stimulation to be activated, the strength  
642 of which is a random value in the range (0,1]. The levels of C8 and pRIP3 are also dependent on  
643 the upstream signaling molecule RIP1, and the knockdown of RIP1 means that the signal could not  
644 be transmitted to downstream signaling molecules. In numerical simulations, the scale  $H$  of the  
645 biphasic kinetics is dependent on the peak pRIP3 level and the level when RIP1 is not knocked  
646 down (deterministic model). The expression of RIP1 is fixed as a control parameter, discretized  
647 with a step size of 0.02 in the normalized parameter space. First, a two-dimensional array of RIP1-  
648 dependent pRIP3 level and an index of RIP1 expression corresponding to pRIP3 peak are obtained  
649 through time evolution. Second, the elements in the two-dimensional array must satisfy the  
650 characteristics of monotonically increasing on the left of  $\text{index}_{\text{pRIP3peak}}$  and decreasing  
651 monotonically on the right. Finally, the pRIP3 level at 100% RIP1 expression must be 0.01 lower  
652 than the  $pRIP3_{\text{peak}}$ . The emergent behavior should satisfy the level of pRIP3 increased by not less  
653 than 50% when RIP1 expression continuously increases by 10%.

654



## 655 **Explanation of topological exhaustive method**

656 Here we seek to uncover the minimal core motifs that enable biological networks to achieve  
657 biphasic and emergent kinetics. The study of functional motifs in complex biological networks  
658 based on node directed networks has been widely reported<sup>4,38,42</sup>, and thus is also applicable to the  
659 achievement of biphasic and emergent kinetics for more complex biological networks embedded  
660 with the minimal core motifs we found.

661 For the two-node directed network, each topology corresponds to a  $2 \times 2$  coupling matrix, and  
662 each coupling edge could be assigned to 1 (promoting), -1 (inhibiting), and 0 (no interaction). There  
663 are theoretically  $3^4$  (=81) topologies. However, the heterogeneity of input and output nodes was  
664 considered in this study, the activation of the output node depends on the input node, and the control  
665 parameter is fixed to the protein (gene) expression amount represented by the input node. Therefore,  
666 the coupling edge of the input node to the output node can only be fixed to 1, and finally only 27  
667 topologies are considered. For a three-node directed network, a control node is introduced, and the  
668 system also relies on the activation of input nodes. The constraints of interaction include 1) the  
669 output node must have a promoting action from the input node or regulatory node; 2) the regulatory  
670 node must have a promoting action from the input node or output node; 3) one of the input nodes  
671 and output nodes must be promoted or inhibited by the regulated node. A class of motifs is  
672 eliminated from all motifs that meet the above three conditions, and their output node and regulatory  
673 node promote each other but are not promoted by the input node. The theoretical  $3^9$  (=16983)  
674 topologies are reduced to 4,698.

675

## 676 **Parameter ranges selection and sampling**

677 In our study, the parameter ranges of the computational models were consistent with those in  
678 previous publications of similar studies<sup>4,38,71</sup>. For each topology, 50,000 parameter sets are  
679 uniformly sampled using Latin hypercube sampling, with parameters ranging from  $k \sim 0.1-10$

680 (logarithmic scale),  $j \sim 0.001-100$ (logarithmic scale),  $d \sim 0.01-1$ (logarithmic scale),  $n \sim 1-4$ (integer  
681 scale), stimulation signal  $\sim 0-1$ .

682

683 **Data availability**

684 The data of this work are available from the corresponding author upon reasonable request.

685

686 **Code availability**

687 The key codes for this work are deposited to GitHub at <https://github.com/XMU-Xu/ANscn>.

688 Other reasonable requirements can be obtained from the corresponding author.

689

690 **REFERENCES**

- 691 1 Nagashima, T. *et al.* Quantitative transcriptional control of ErbB receptor signaling  
692 undergoes graded to biphasic response for cell differentiation. *Journal of Biological*  
693 *Chemistry* **282**, 4045-4056, doi:10.1074/jbc.M608653200 (2007).
- 694 2 Shin, D. *et al.* The hidden switches underlying ROR alpha-mediated circuits that critically  
695 regulate uncontrolled cell proliferation. *Journal of Molecular Cell Biology* **6**, 338-348,  
696 doi:10.1093/jmcb/mju023 (2014).
- 697 3 Shin, S. Y. *et al.* The switching role of beta-adrenergic receptor signalling in cell survival  
698 or death decision of cardiomyocytes. *Nature Communications* **5**, doi:10.1038/ncomms6777  
699 (2014).
- 700 4 Ma, W. Z., Trusina, A., El-Samad, H., Lim, W. A. & Tang, C. Defining Network Topologies  
701 that Can Achieve Biochemical Adaptation. *Cell* **138**, 760-773,  
702 doi:10.1016/j.cell.2009.06.013 (2009).
- 703 5 Basu, S., Mehreja, R., Thiberge, S., Chen, M. T. & Weiss, R. Spatiotemporal control of  
704 gene expression with pulse-generating networks. *Proceedings of the National Academy of*  
705 *Sciences of the United States of America* **101**, 6355-6360, doi:10.1073/pnas.0307571101  
706 (2004).
- 707 6 Sasagawa, S., Ozaki, Y., Fujita, K. & Kuroda, S. Prediction and validation of the distinct  
708 dynamics of transient and sustained ERK activation. *Nature Cell Biology* **7**, 365-U331,  
709 doi:10.1038/ncb1233 (2005).
- 710 7 Liu, W. *et al.* Biphasic regulation of transcriptional surge generated by the gene feedback  
711 loop in a two-component system. *Bioinformatics* **37**, 2682-2690,  
712 doi:10.1093/bioinformatics/btab138 (2021).
- 713 8 Tamotsu, S., Schomerus, C., Stehle, J. H., Roseboom, P. H. & Korf, H. W.  
714 NOREPINEPHRINE-INDUCED PHOSPHORYLATION OF THE TRANSCRIPTION

- 715 FACTOR CREB IN ISOLATED RAT PINEALOCYTES - AN  
716 IMMUNOCYTOCHEMICAL STUDY. *Cell and Tissue Research* **282**, 219-226,  
717 doi:10.1007/bf00319113 (1995).
- 718 9 Wu, Y. N. *et al.* Different response modes and cooperation modulations of blue-light  
719 receptors in photomorphogenesis. *Plant Cell and Environment* **44**, 1802-1815,  
720 doi:10.1111/pce.14038 (2021).
- 721 10 Xu, F., Zhang, J. Q., Jin, M., Huang, S. F. & Fang, T. T. Chimera states and synchronization  
722 behavior in multilayer memristive neural networks. *Nonlinear Dynamics* **94**, 775-783,  
723 doi:10.1007/s11071-018-4393-9 (2018).
- 724 11 Xu, F., Zhang, J. Q., Fang, T. T., Huang, S. F. & Wang, M. S. Synchronous dynamics in  
725 neural system coupled with memristive synapse. *Nonlinear Dynamics* **92**, 1395-1402,  
726 doi:10.1007/s11071-018-4134-0 (2018).
- 727 12 Li, X. *et al.* RIP1-dependent linear and nonlinear recruitments of caspase-8 and RIP3  
728 respectively to necrosome specify distinct cell death outcomes. *Protein & Cell* **12**, 858-876,  
729 doi:10.1007/s13238-020-00810-x (2021).
- 730 13 Newman, M. E. J. & Clauset, A. Structure and inference in annotated networks. *Nature*  
731 *Communications* **7**, doi:10.1038/ncomms11863 (2016).
- 732 14 Lambiotte, R., Rosvall, M. & Scholtes, I. From networks to optimal higher-order models of  
733 complex systems. *Nat. Phys.* **15**, 313-320, doi:10.1038/s41567-019-0459-y (2019).
- 734 15 Sanchez-Garcia, R. J. Exploiting symmetry in network analysis. *Communications Physics*  
735 **3**, doi:10.1038/s42005-020-0345-z (2020).
- 736 16 Li, Z. D., Liu, S. X. & Yang, Q. Incoherent Inputs Enhance the Robustness of Biological  
737 Oscillators. *Cell Syst.* **5**, 72-81, doi:10.1016/j.cels.2017.06.013 (2017).

- 738 17 Qiao, L., Zhang, Z.-B., Zhao, W., Wei, P. & Zhang, L. Network design principle for robust  
739 oscillatory behaviors with respect to biological noise. *eLife* **11**, doi:10.7554/eLife.76188  
740 (2022).
- 741 18 Broido, A. D. & Clauset, A. Scale-free networks are rare. *Nature Communications* **10**,  
742 doi:10.1038/s41467-019-08746-5 (2019).
- 743 19 Chen, X. *et al.* Mosaic composition of RIP1-RIP3 signalling hub and its role in regulating  
744 cell death. *Nature Cell Biology* **24**, 471-+, doi:10.1038/s41556-022-00854-7 (2022).
- 745 20 Wang, L., Du, F. H. & Wang, X. D. TNF-alpha induces two distinct caspase-8 activation  
746 pathways. *Cell* **133**, 693-703, doi:10.1016/j.cell.2008.03.036 (2008).
- 747 21 Zhang, D. W. *et al.* RIP3, an Energy Metabolism Regulator That Switches TNF-Induced  
748 Cell Death from Apoptosis to Necrosis. *Science* **325**, 332-336,  
749 doi:10.1126/science.1172308 (2009).
- 750 22 Brenner, D., Blaser, H. & Mak, T. W. Regulation of tumour necrosis factor signalling: live  
751 or let die. *Nature Reviews Immunology* **15**, 362-374, doi:10.1038/nri3834 (2015).
- 752 23 Han, J. H., Zhong, C. Q. & Zhang, D. W. Programmed necrosis: backup to and competitor  
753 with apoptosis in the immune system. *Nature Immunology* **12**, 1143-1149,  
754 doi:10.1038/ni.2159 (2011).
- 755 24 Zheng, L. X. *et al.* Competitive control of independent programs of tumor necrosis factor  
756 receptor-induced cell death by TRADD and RIP1. *Molecular and Cellular Biology* **26**,  
757 3505-3513, doi:10.1128/mcb.26.9.3505-3513.2006 (2006).
- 758 25 Nunez, R., Sancho-Martinez, S. M., Novoa, J. M. L. & Lopez-Hernandez, F. J. Apoptotic  
759 volume decrease as a geometric determinant for cell dismantling into apoptotic bodies. *Cell*  
760 *Death and Differentiation* **17**, 1665-1671, doi:10.1038/cdd.2010.96 (2010).

- 761 26 Orozco, S. *et al.* RIPK1 both positively and negatively regulates RIPK3 oligomerization  
762 and necroptosis. *Cell Death and Differentiation* **21**, 1511-1521, doi:10.1038/cdd.2014.76  
763 (2014).
- 764 27 Oberst, A. *et al.* Catalytic activity of the caspase-8-FLIPL complex inhibits RIPK3-  
765 dependent necrosis. *Nature* **471**, 363-367, doi:10.1038/nature09852 (2011).
- 766 28 Yang, Z. H. *et al.* A Non-canonical PDK1-RSK Signal Diminishes Pro-caspase-8-Mediated  
767 Necroptosis Blockade. *Molecular Cell* **80**, 296-310, doi:10.1016/j.molcel.2020.09.004  
768 (2020).
- 769 29 Li, J. X. *et al.* The RIP1/RIP3 Necrosome Forms a Functional Amyloid Signaling Complex  
770 Required for Programmed Necrosis. *Cell* **150**, 339-350, doi:10.1016/j.cell.2012.06.019  
771 (2012).
- 772 30 Mompean, M. *et al.* The Structure of the Necrosome RIPK1-RIPK3 Core, a Human Hetero-  
773 Amyloid Signaling Complex. *Cell* **173**, 1244-1253, doi:10.1016/j.cell.2018.03.032 (2018).
- 774 31 Fang, X. N., Kruse, K., Lu, T. & Wang, J. Nonequilibrium physics in biology. *Reviews of*  
775 *Modern Physics* **91**, doi:10.1103/RevModPhys.91.045004 (2019).
- 776 32 Wang, J., Xu, L. & Wang, E. K. Potential landscape and flux framework of nonequilibrium  
777 networks: Robustness, dissipation, and coherence of biochemical oscillations. *Proceedings*  
778 *of the National Academy of Sciences of the United States of America* **105**, 12271-12276,  
779 doi:10.1073/pnas.0800579105 (2008).
- 780 33 Chu, X. K. & Wang, J. Quantifying Chromosome Structural Reorganizations During  
781 Differentiation, Reprogramming, and Transdifferentiation. *Physical Review Letters* **129**,  
782 doi:10.1103/PhysRevLett.129.068102 (2022).
- 783 34 Skinner, D. J. & Dunkel, J. Estimating Entropy Production from Waiting Time Distributions.  
784 *Physical Review Letters* **127**, doi:10.1103/PhysRevLett.127.198101 (2021).

- 785 35 Skinner, D. J. & Dunkel, J. Improved bounds on entropy production in living systems.  
786 *Proceedings of the National Academy of Sciences of the United States of America* **118**,  
787 doi:10.1073/pnas.2024300118 (2021).
- 788 36 Neri, I., Roldan, E. & Julicher, F. Statistics of Infima and Stopping Times of Entropy  
789 Production and Applications to Active Molecular Processes. *Phys. Rev. X* **7**,  
790 doi:10.1103/PhysRevX.7.011019 (2017).
- 791 37 van der Meer, J., Ertel, B. & Seifert, U. Thermodynamic Inference in Partially Accessible  
792 Markov Networks: A Unifying Perspective from Transition-Based Waiting Time  
793 Distributions. *Phys. Rev. X* **12**, doi:10.1103/PhysRevX.12.031025 (2022).
- 794 38 Xu, F. *et al.* Oscillations Governed by the Incoherent Dynamics in Necroptotic Signaling.  
795 *Front. Physics* **9**, doi:10.3389/fphy.2021.726638 (2021).
- 796 39 Chang, D. E. *et al.* Building biological memory by linking positive feedback loops.  
797 *Proceedings of the National Academy of Sciences of the United States of America* **107**, 175-  
798 180, doi:10.1073/pnas.0908314107 (2010).
- 799 40 Otero-Muras, I., Yordanov, P. & Stelling, J. Chemical Reaction Network Theory elucidates  
800 sources of multistability in interferon signaling. *PLoS Comput. Biol.* **13**,  
801 doi:10.1371/journal.pcbi.1005454 (2017).
- 802 41 Freyer, F., Roberts, J. A., Ritter, P. & Breakspear, M. A Canonical Model of Multistability  
803 and Scale-Invariance in Biological Systems. *PLoS Comput. Biol.* **8**,  
804 doi:10.1371/journal.pcbi.1002634 (2012).
- 805 42 Qiao, L. X., Zhao, W., Tang, C., Nie, Q. & Zhang, L. Network Topologies That Can  
806 Achieve Dual Function of Adaptation and Noise Attenuation. *Cell Syst.* **9**, 271-285,  
807 doi:10.1016/j.cels.2019.08.006 (2019).
- 808 43 Huang, B. *et al.* Interrogating the topological robustness of gene regulatory circuits by  
809 randomization. *PLoS Comput. Biol.* **13**, doi:10.1371/journal.pcbi.1005456 (2017).

- 810 44 Adler, M., Szekely, P., Mayo, A. & Alon, U. Optimal Regulatory Circuit Topologies for  
811 Fold-Change Detection. *Cell Syst.* **4**, 171-181, doi:10.1016/j.cels.2016.12.009 (2017).
- 812 45 van der Maaten, L. & Hinton, G. Visualizing Data using t-SNE. *Journal of Machine*  
813 *Learning Research* **9**, 2579-2605 (2008).
- 814 46 Jolley, C. C., Ode, K. L. & Ueda, H. R. A Design Principle for a Posttranslational  
815 Biochemical Oscillator. *Cell Reports* **2**, 938-950, doi:10.1016/j.celrep.2012.09.006 (2012).
- 816 47 Cho, Y. *et al.* Phosphorylation-Driven Assembly of the RIP1-RIP3 Complex Regulates  
817 Programmed Necrosis and Virus-Induced Inflammation. *Cell* **137**, 1112-1123,  
818 doi:10.1016/j.cell.2009.05.037 (2009).
- 819 48 Dillon, C. P. *et al.* RIPK1 Blocks Early Postnatal Lethality Mediated by Caspase-8 and  
820 RIPK3. *Cell* **157**, 1189-1202, doi:10.1016/j.cell.2014.04.018 (2014).
- 821 49 Newton, K. *et al.* RIPK1 inhibits ZBP1-driven necroptosis during development. *Nature* **540**,  
822 129-133, doi:10.1038/nature20559 (2016).
- 823 50 Green, D. R. Another face of RIPK1. *Embo Reports* **16**, 674-675,  
824 doi:10.15252/embr.201540470 (2015).
- 825 51 Weinlich, R. & Green, D. R. The Two Faces of Receptor Interacting Protein Kinase-1.  
826 *Molecular Cell* **56**, 469-480, doi:10.1016/j.molcel.2014.11.001 (2014).
- 827 52 Ghomlaghi, M., Yang, G., Shin, S., James, D. E. & Nguyen, L. K. Dynamic modelling of  
828 the PI3K/MTOR signalling network uncovers biphasic dependence of mTORC1 activity on  
829 the mTORC2 subunit SIN1. *PLoS Comput. Biol.* **17**, doi:10.1371/journal.pcbi.1008513  
830 (2021).
- 831 53 Navarrete, F. A. *et al.* Biphasic Role of Calcium in Mouse Sperm Capacitation Signaling  
832 Pathways. *Journal of Cellular Physiology* **230**, 1758-1769, doi:10.1002/jcp.24873 (2015).



- 833 54 Saez, M. *et al.* Statistically derived geometrical landscapes capture principles of decision-  
834 making dynamics during cell fate transitions. *Cell Syst.* **13**, 12-28.e13,  
835 doi:10.1016/j.cels.2021.08.013 (2022).
- 836 55 Zhu, L. G. *et al.* Network modeling-based identification of the switching targets between  
837 pyroptosis and secondary pyroptosis. *Chaos Solitons & Fractals* **155**,  
838 doi:10.1016/j.chaos.2021.111724 (2022).
- 839 56 Li, X. *et al.* Caspase-1 and Gasdermin D Afford the Optimal Targets with Distinct  
840 Switching Strategies in NLRP1b Inflammasome-Induced Cell Death. *Research* **2022**,  
841 doi:10.34133/2022/9838341 (2022).
- 842 57 Li, Y. *et al.* A programmable fate decision landscape underlies single-cell aging in yeast.  
843 *Science* **369**, 325-329, doi:10.1126/science.aax9552 (2020).
- 844 58 Shu, J. *et al.* Induction of Pluripotency in Mouse Somatic Cells with Lineage Specifiers.  
845 *Cell* **153**, 963-975, doi:10.1016/j.cell.2013.05.001 (2013).
- 846 59 Kang, X. & Li, C. H. A Dimension Reduction Approach for Energy Landscape: Identifying  
847 Intermediate States in Metabolism-EMT Network. *Advanced Science* **8**,  
848 doi:10.1002/advs.202003133 (2021).
- 849 60 Kang, X., Wang, J. & Li, C. H. Exposing the Underlying Relationship of Cancer Metastasis  
850 to Metabolism and Epithelial-Mesenchymal Transitions. *Iscience* **21**, 754-772,  
851 doi:10.1016/j.isci.2019.10.060 (2019).
- 852 61 Zhang, J. *et al.* Deep Representation Learning for Complex Free-Energy Landscapes.  
853 *Journal of Physical Chemistry Letters* **10**, 5571-5576, doi:10.1021/acs.jpcclett.9b02012  
854 (2019).
- 855 62 Xu, Y. *et al.* Solving Fokker-Planck equation using deep learning. *Chaos* **30**,  
856 doi:10.1063/1.5132840 (2020).

- 857 63 Mehta, P. & Schwab, D. J. Energetic costs of cellular computation. *Proceedings of the*  
858 *National Academy of Sciences of the United States of America* **109**, 17978-17982,  
859 doi:10.1073/pnas.1207814109 (2012).
- 860 64 Barato, A. C. & Seifert, U. Thermodynamic Uncertainty Relation for Biomolecular  
861 Processes. *Physical Review Letters* **114**, doi:10.1103/PhysRevLett.114.158101 (2015).
- 862 65 Lang, A. H., Fisher, C. K., Mora, T. & Mehta, P. Thermodynamics of Statistical Inference  
863 by Cells. *Physical Review Letters* **113**, doi:10.1103/PhysRevLett.113.148103 (2014).
- 864 66 Still, S., Sivak, D. A., Bell, A. J. & Crooks, G. E. Thermodynamics of Prediction. *Physical*  
865 *Review Letters* **109**, doi:10.1103/PhysRevLett.109.120604 (2012).
- 866 67 Dutta, S. Thermodynamics of multiple Maxwell demons. *European Physical Journal B* **95**,  
867 doi:10.1140/epjb/s10051-022-00394-x (2022).
- 868 68 Ito, S. & Sagawa, T. Maxwell's demon in biochemical signal transduction with feedback  
869 loop. *Nature Communications* **6**, doi:10.1038/ncomms8498 (2015).
- 870 69 Engberg, N., Kahn, M., Petersen, D. R., Hansson, M. & Serup, P. Retinoic Acid Synthesis  
871 Promotes Development of Neural Progenitors from Mouse Embryonic Stem Cells by  
872 Suppressing Endogenous, Wnt-Dependent Nodal Signaling. *Stem Cells* **28**, 1498-1509,  
873 doi:10.1002/stem.479 (2010).
- 874 70 Eling, N., Morgan, M. D. & Marioni, J. C. Challenges in measuring and understanding  
875 biological noise. *Nature Reviews Genetics* **20**, 536-548, doi:10.1038/s41576-019-0130-6  
876 (2019).
- 877 71 Tsai, T. Y. C. *et al.* Robust, tunable biological oscillations from interlinked positive and  
878 negative feedback loops. *Science* **321**, 126-129, doi:10.1126/science.1156951 (2008).
- 879 72 Li, Z. D., Liu, S. X. & Yang, Q. Incoherent Inputs Enhance the Robustness of Biological  
880 Oscillators. *Cell Syst.* **5**, 72-+, doi:10.1016/j.cels.2017.06.013 (2017).
- 881

882 **Acknowledgements**

883 We greatly thank PhD. Ming Yi (School of Mathematics and Physics, China University of  
884 Geosciences, Wuhan) and PhD. Peng Ji (Institute of Science and Technology for Brain-Inspired  
885 Intelligence, Fudan University, Shanghai) for helpful discussion of this paper. This work was  
886 supported by the National Natural Science Foundation of China (Grants Nos. 12090052 and  
887 11874310), the Ministry of Science and Technology of the People's Republic of China under grant  
888 nos. 2021ZD0201900 and 2021ZD0201904, and the Fujian Province Foundation (Grant No.  
889 2020Y4001).

890

891 **Author contributions**

892 Fei Xu conceived the idea, developed the algorithms, analyzed the data and wrote the paper. Xiang  
893 Li conceived the idea, analyzed the data and wrote the paper. Rui Wu performed the experimental  
894 analysis. Hong Qi, Jun Jin, Zhilong Liu, Yuning Wu, Chuanshen Shen and Hai Lin helped to  
895 analyze data. Jianwei Shuai revised the paper and supervised the project. Fei Xu and Xiang Li  
896 contributed equally to this work.

897

898 **Competing interests**

899 All other authors declare they have no competing interests

900

901

902

903

904

905

906

907 Supplemental Information for:

908 **Topological design principle for the robustness of necroptosis biphasic, emergent, and**  
 909 **coexistent (BEC) dynamics**

910 **Fei Xu *et al.***

911

912 **Computational modeling**

913 Ordinary differential equations are built to describe the evolutionary dynamics of cell death  
 914 signaling mediated by TNF<sup>71,72</sup>. For example, the interaction of RIP3 phosphorylation by pRIP1 is:

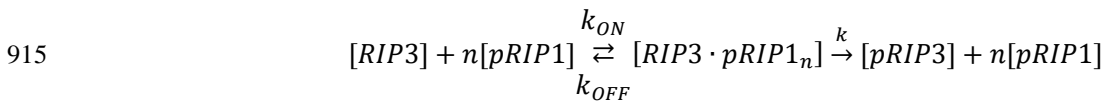

916 The equation of the intermediate complex [pRIP1·RIP3] is described as follows:

$$917 \quad \frac{d[RIP3 \cdot pRIP1_n]}{dt} = k_{ON} * [RIP3] * [pRIP1]^n - k_{OFF} * [RIP3 \cdot pRIP1_n] - k * [RIP3 \cdot pRIP1_n]$$

918 At steady state,

$$919 \quad [RIP3 \cdot pRIP1_n] = \frac{k_{ON}}{k_{OFF} + k} * [RIP3] * [pRIP1]^n$$

920 Assuming the binding between proteins is independent, and the dissociation rate of the complex is  
 921 much larger than the binding rate.

$$922 \quad [RIP3 \cdot pRIP1_n] = [RIP3]_{tot} - [pRIP3] - [RIP3]$$

923 With the normalized total amount of proteins, the rate of pRIP1-mediated phosphorylation of pRIP3  
 924 is described as follows:

$$925 \quad v_{pRIP3 \text{ activated by } pRIP1} = k * (1 - [pRIP3]) \frac{pRIP1^n}{pRIP1^n + \frac{k_{OFF} + k}{k_{ON}}} = k * (1 - [pRIP3]) \frac{[pRIP1]^n}{[pRIP1]^n + j^n}$$

926

927

928

929 The complete equations of deterministic TNF circuit model are presented below:

| ODEs                                                                                                            | Interaction term                                                                                   | Parameters      |
|-----------------------------------------------------------------------------------------------------------------|----------------------------------------------------------------------------------------------------|-----------------|
| $\frac{d[acTRADD]}{dt} = F_{TRADD}$ $F_{TRADD} = v_1 - v_2 - v_3$                                               | Activation by <i>TNF</i>                                                                           | $k_{ac1}=1.7$   |
|                                                                                                                 | $v_1 = k_{ac1} * (1 - [acTRADD]) * \frac{[TNF]^{n_{ac1}}}{([TNF]^{n_{ac1}} + j_{ac1}^{n_{ac1}})}$  | $j_{ac1}=0.012$ |
|                                                                                                                 | Inhibition by <i>pRIP1</i>                                                                         | $n_{ac1}=3$     |
|                                                                                                                 | $v_2 = k_1 * [acTRADD] * \frac{[pRIP1]^{n_1}}{([pRIP1]^{n_1} + j_1^{n_1})}$                        | $k_1=9.5$       |
|                                                                                                                 | Degradation                                                                                        | $j_1=0.12$      |
| $\frac{d[pRIP1]}{dt} = F_{RIP1}$ $F_{RIP1} = v_4 + v_5 - v_6 - v_7 - v_8$                                       | $n_1=2$                                                                                            |                 |
|                                                                                                                 | $v_3 = d_1 * [acTRADD]$                                                                            | $d_1=0.03$      |
|                                                                                                                 | Activation by <i>TNF</i>                                                                           | $k_{ac2}=0.35$  |
|                                                                                                                 | $v_4 = k_{ac2} * (1 - [pRIP1]) * \frac{[TNF]^{n_{ac2}}}{([TNF]^{n_{ac2}} + j_{ac2}^{n_{ac2}})}$    | $j_{ac2}=2.3$   |
|                                                                                                                 | Phosphorylation by <i>pRIP3</i>                                                                    | $n_{ac2}=1$     |
| $\frac{d[pRIP3]}{dt} = F_{RIP3}$ $F_{RIP3} = v_9 + v_{10} - v_{11} - v_{12}$                                    | $k_3=6.7$                                                                                          |                 |
|                                                                                                                 | $v_5 = k_3 * (1 - [pRIP1]) * \frac{[pRIP3]^{n_3}}{([pRIP3]^{n_3} + j_3^{n_3})}$                    | $j_3=1.2$       |
|                                                                                                                 | Inhibition by <i>acTRADD</i>                                                                       | $n_3=3$         |
|                                                                                                                 | $v_6 = k_2 * [pRIP1] * \frac{[acTRADD]^{n_2}}{([acTRADD]^{n_2} + j_2^{n_2})}$                      | $k_2=0.17$      |
|                                                                                                                 | Cleavage by <i>C8</i> in Complex-IIb                                                               | $j_2=1.47$      |
| $\frac{d[C8]}{dt} = F_{C8IIa} + F_{C8IIb}$ $F_{C8IIa} = v_{13} - v_{16}$ $F_{C8IIb} = v_{14} - v_{15} - v_{16}$ | $k_4=1.4$                                                                                          |                 |
|                                                                                                                 | $v_7 = k_4 * [pRIP1] * \frac{[C8_{IIb}]^{n_4}}{([C8_{IIb}]^{n_4} + j_4^{n_4})}$                    | $j_4=0.008$     |
|                                                                                                                 | Degradation                                                                                        | $n_4=4$         |
|                                                                                                                 | $v_8 = d_2 * [pRIP1]$                                                                              | $d_2=0.1$       |
|                                                                                                                 | Phosphorylation by <i>pRIP1</i>                                                                    | $k_7=2.1$       |
| $\frac{d[C8]}{dt} = F_{C8IIa} + F_{C8IIb}$ $F_{C8IIa} = v_{13} - v_{16}$ $F_{C8IIb} = v_{14} - v_{15} - v_{16}$ | $v_9 = k_7 * (1 - [pRIP3]) * \frac{[pRIP1]^{n_7}}{([pRIP1]^{n_7} + j_7^{n_7})}$                    | $j_7=0.16$      |
|                                                                                                                 | Autophosphorylation                                                                                | $n_7=4$         |
|                                                                                                                 | $v_{10} = k_8 * (1 - [pRIP3]) * \frac{[pRIP3]^{n_8}}{([pRIP3]^{n_8} + j_8^{n_8})}$                 | $k_8=1.0$       |
|                                                                                                                 | Cleavage by <i>C8</i> in Complex-IIb                                                               | $j_8=11.4$      |
|                                                                                                                 | $v_{11} = k_9 * [pRIP3] * \frac{[C8_{IIb}]^{n_9}}{([C8_{IIb}]^{n_9} + j_9^{n_9})}$                 | $n_8=4$         |
| $\frac{d[C8]}{dt} = F_{C8IIa} + F_{C8IIb}$ $F_{C8IIa} = v_{13} - v_{16}$ $F_{C8IIb} = v_{14} - v_{15} - v_{16}$ | Degradation                                                                                        | $k_9=8.5$       |
|                                                                                                                 | $v_{12} = d_3 * [pRIP3]$                                                                           | $j_9=0.0015$    |
|                                                                                                                 | Activation by <i>acTRADD</i> in Complex-IIa                                                        | $n_9=4$         |
|                                                                                                                 | $v_{13} = k_{10} * (1 - [C8]) * \frac{[acTRADD]^{n_{10}}}{([acTRADD]^{n_{10}} + j_{10}^{n_{10}})}$ | $d_3=0.14$      |
|                                                                                                                 | Activation by <i>pRIP1</i> in Complex-IIb                                                          | $k_{10}=3.6$    |
| $\frac{d[C8]}{dt} = F_{C8IIa} + F_{C8IIb}$ $F_{C8IIa} = v_{13} - v_{16}$ $F_{C8IIb} = v_{14} - v_{15} - v_{16}$ | $j_{10}=1.25$                                                                                      |                 |
|                                                                                                                 | $v_{14} = k_5 * (1 - [C8]) * \frac{[pRIP1]^{n_5}}{([pRIP1]^{n_5} + j_5^{n_5})}$                    | $n_{10}=4$      |
|                                                                                                                 | Inhibition by <i>pRIP3</i> in Complex-IIb                                                          | $k_5=0.3$       |
|                                                                                                                 | $v_{15} = k_6 * [C8_{IIb}] * \frac{[pRIP3]^{n_6}}{([pRIP3]^{n_6} + j_6^{n_6})}$                    | $j_5=10.4$      |
|                                                                                                                 | Degradation                                                                                        | $n_5=2$         |
| $\frac{d[C8]}{dt} = F_{C8IIa} + F_{C8IIb}$ $F_{C8IIa} = v_{13} - v_{16}$ $F_{C8IIb} = v_{14} - v_{15} - v_{16}$ | $k_6=0.2$                                                                                          |                 |
|                                                                                                                 | $v_{16} = d_4 * [C8]$                                                                              | $j_6=0.036$     |

930

931

932 Kinetic parameters estimation

933 Table of public experimental data sources for parameter estimation<sup>12</sup>.

| <b>This paper</b> |                       | <b>Data Sources</b>                                                                                 |
|-------------------|-----------------------|-----------------------------------------------------------------------------------------------------|
| Figure 1D         | Figure 3F, 5F and S3B | <a href="https://doi.org/10.1007/s13238-020-00810-x">https://doi.org/10.1007/s13238-020-00810-x</a> |
| Figure 1F         | Figure 5H             |                                                                                                     |
| Figure S1         | Figure 5A, 5F and 5H  |                                                                                                     |

934

935

936 **Supplemental Figures**

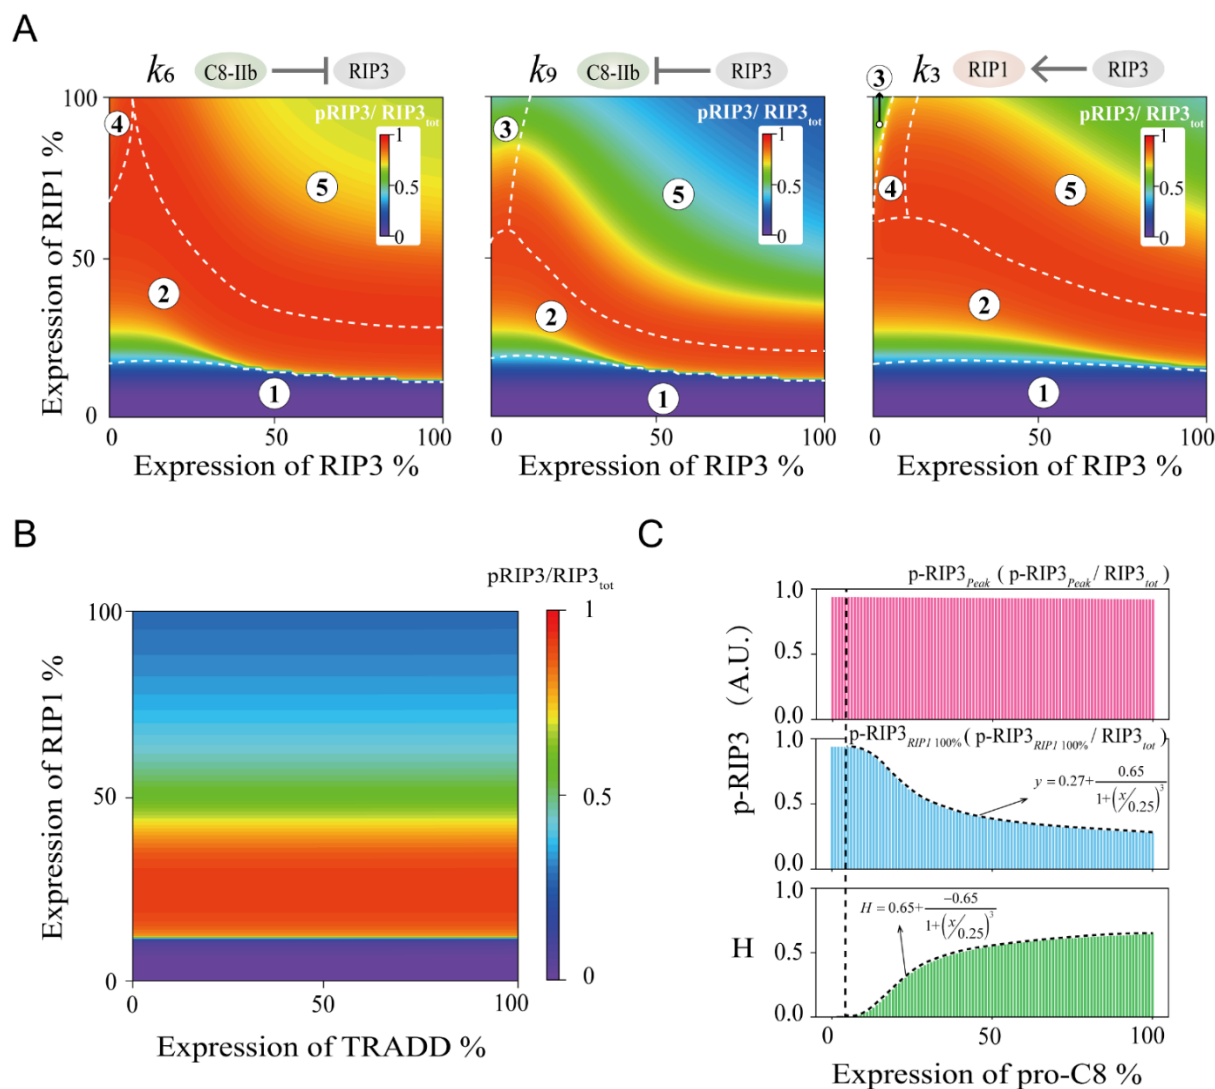

937

938 **Figure S1.** (A) The relative level of pRIP3 in the RIP3-RIP1 phase space when the terms of  $k_6$  (inhibition of C8

939 on pRIP3),  $k_9$  (the inhibition of pRIP3 on C8), and  $k_3$  (the positive feedback of pRIP3 on RIP1) are reduced 10-

940 fold, respectively. (B) The relative level of pRIP3 in the TRADD-RIP1 phase space. (C) The variation of

941 pRIP3<sub>Peak</sub>, pRIP3<sub>RIP1\_100%</sub>, and H with pro-C8 expression level increases.

942



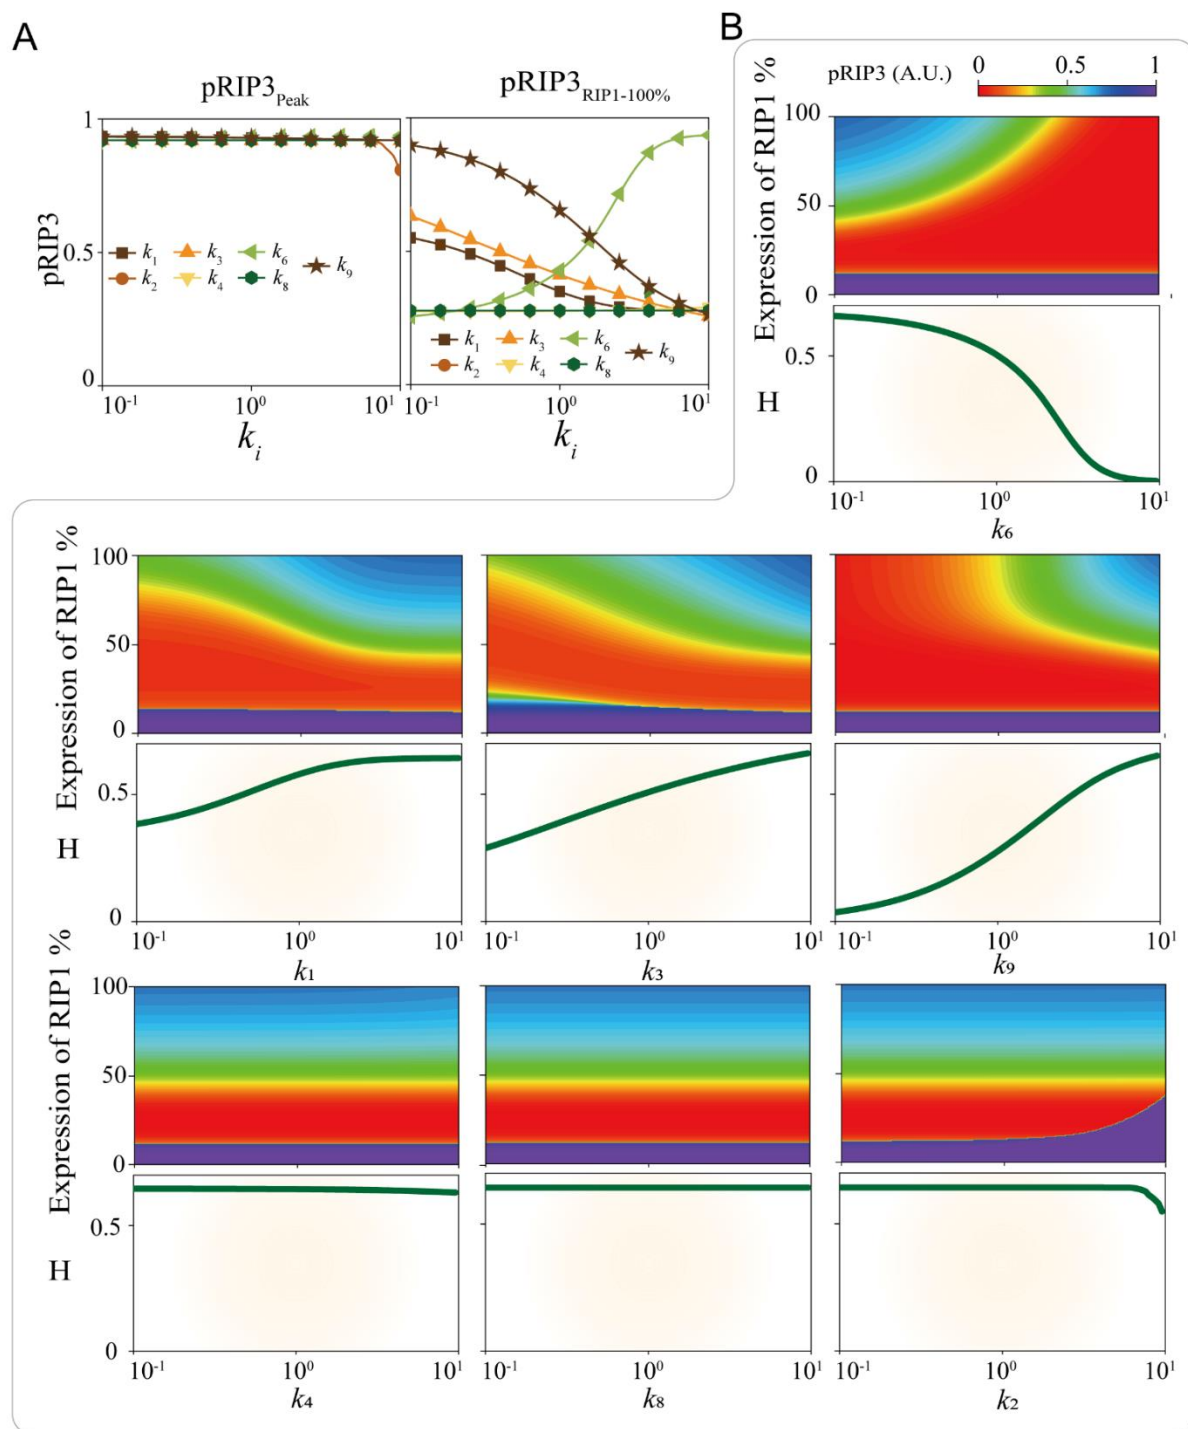

943

944 **Figure S2.** (A) Parameter sensitivity of other seven terms in modulating  $pRIP3_{peak}$  and  $pRIP3_{RIP1-100\%}$ . (B) Analysis of

945 the seven terms regulations on  $pRIP3$  and the scale of biphasic dynamics  $H$ .

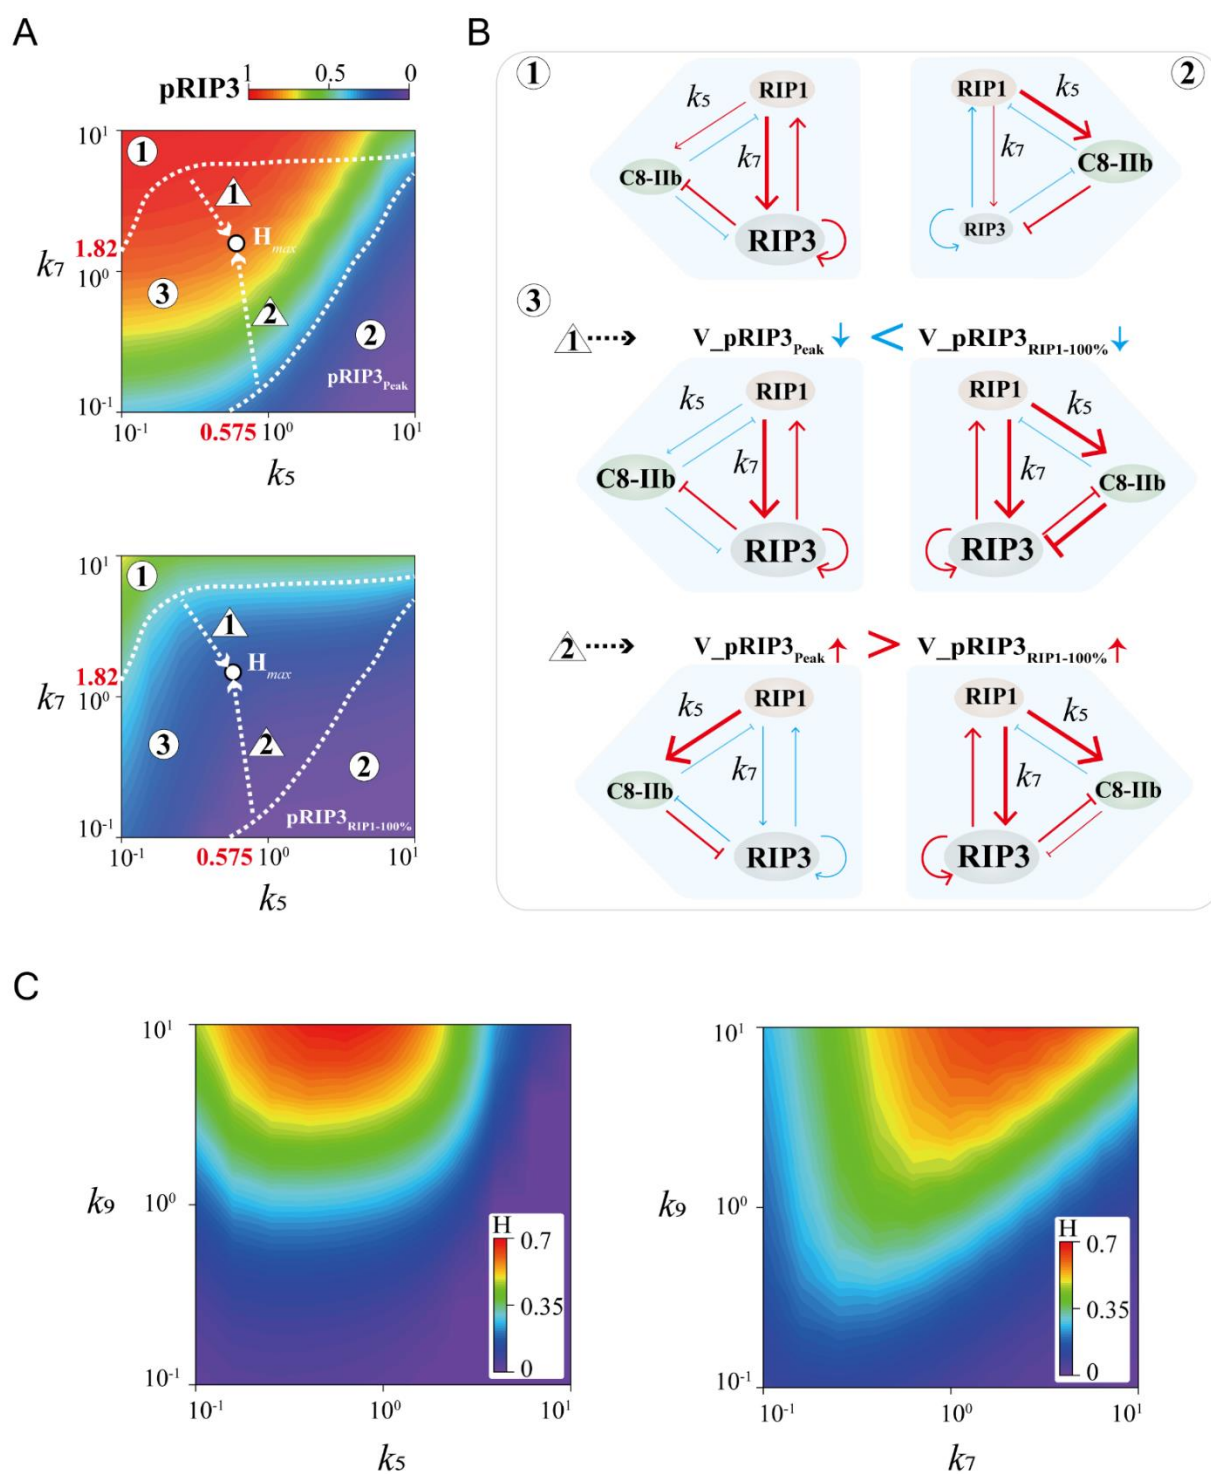

946

947 **Figure S3.** (A) Levels of  $pRIP3_{peak}$  and  $pRIP3_{RIP1-100\%}$  in the  $k_5$ - $k_7$  parameter space, and the phase plane is decomposed  
 948 into three regions and two processes. (B) Mechanistic analysis of  $k_5$  and  $k_7$  Bell-shaped regulation on pRIP3 biphasic  
 949 dynamics. In regions 1 and 2, two terms, activation of RIP3 by RIP1 and activation of C8 by RIP1, play the dominant  
 950 role, respectively. Their corresponding  $pRIP3_{peak}$  and  $pRIP3_{RIP1-100\%}$  are both high or both low, resulting in small scales  
 951 of biphasic dynamics. The decline rate of  $pRIP3_{peak}$  in process 1 is lower than that of  $pRIP3_{RIP1-100\%}$ , and the increase

952 rate of  $pRIP3_{peak}$  in process 2 is greater than that of  $pRIP3_{RIP1_{100\%}}$ . (C) Phase diagram of H in  $k_5-k_7$  and  $k_7-k_9$   
 953 spaces.  
 954

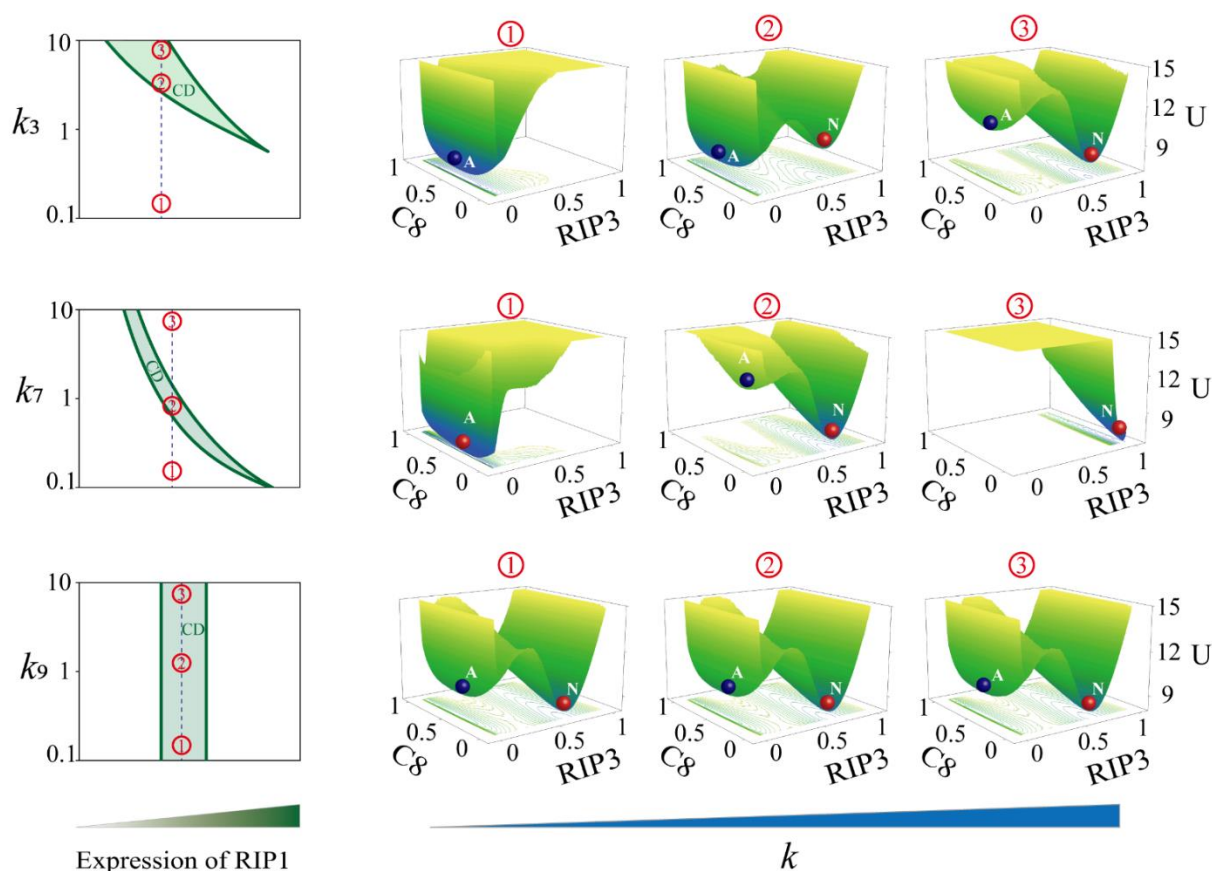

955

956 **Figure S4.** Phase diagram of the system stability on the co-variation of interaction term ( $k_3$ ,  $k_7$ ,  
 957 and  $k_9$ ) and the expression of RIP1. The green shaded region indicates the coexistence of apoptosis  
 958 and necroptosis. The potential energy landscape in  $C_8$ -RIP3 phase space of the cell death system  
 959 at three typical values fixed for each parameter.  
 960

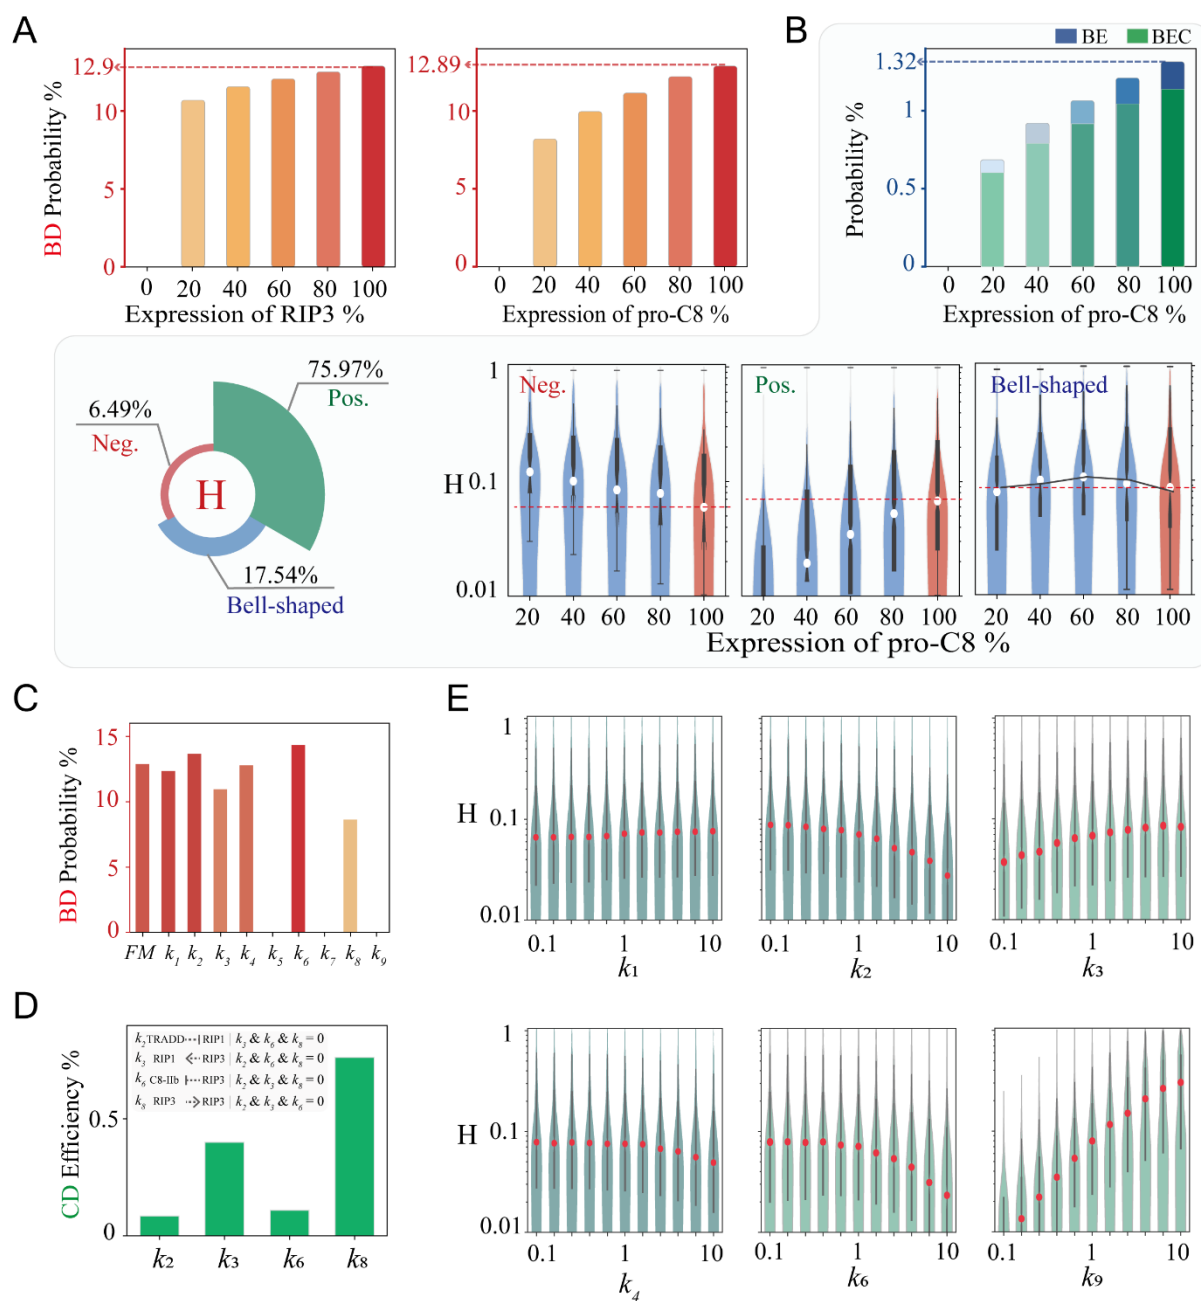

961

962 **Figure S5.** (A) Random circuit analysis with five representative RIP3 and pro-C8 expression levels  
 963 to count the probabilities for achieving pRIP3 biphasic dynamics. (B) Random circuit analysis with  
 964 five representative pro-C8 expression levels to count the probabilities for achieving pRIP3 BE and  
 965 BEC dynamics, and the statistics of the regulatory behavior of RIP3 on the scale of biphasic  
 966 dynamics H. (C) The probability of the system achieving biphasic dynamics when all interactions  
 967 are blocked, respectively. (D) Contribution of all the positive feedback loops in circuit to achieve  
 968 coexistence dynamics. (E) Statistics of the regulation of other six terms on H.

969

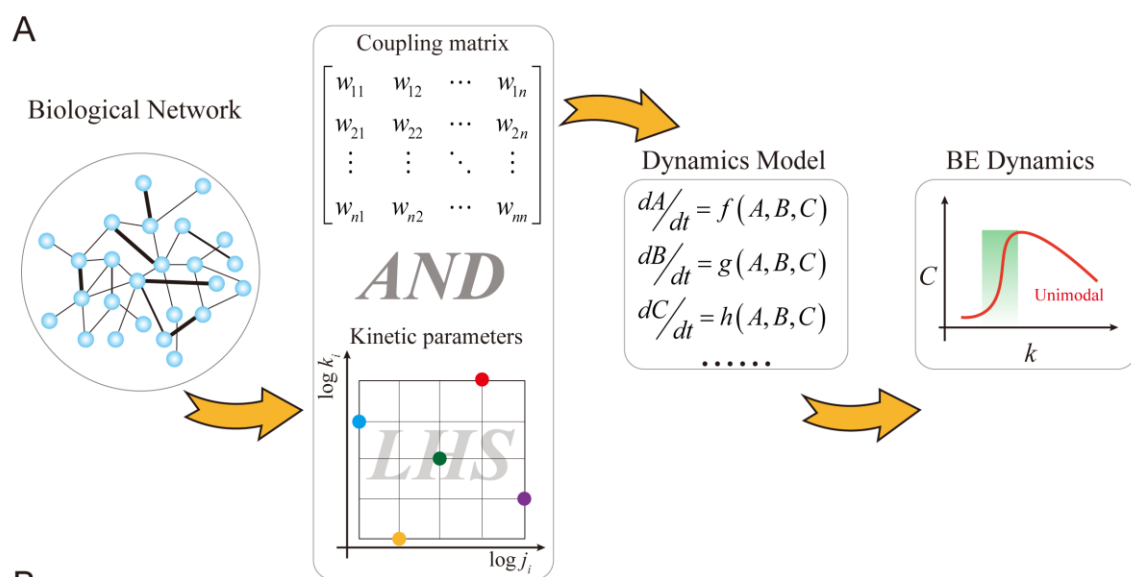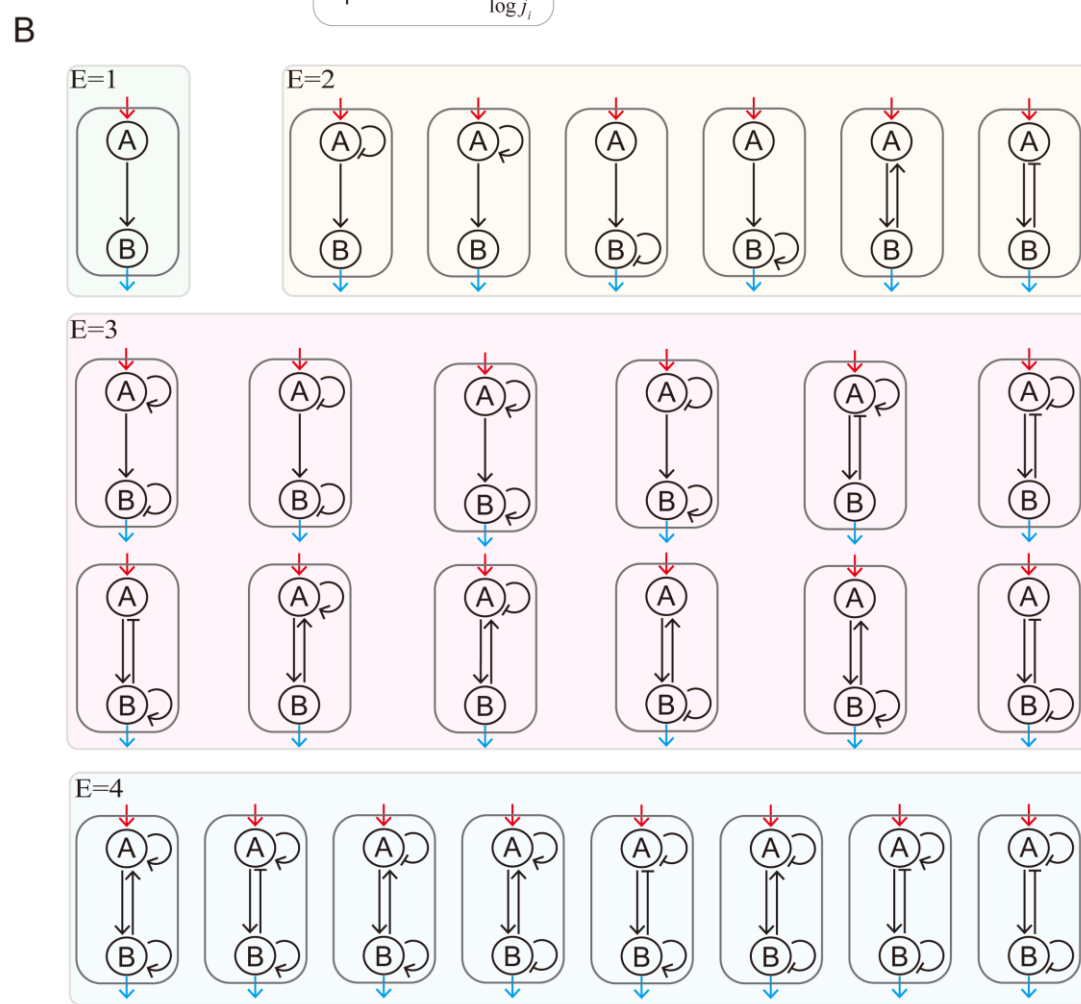

**Figure S6.** (A) Workflow for topology-to-function mapping of BE dynamics. (B) The 27 two-node motifs are classified according to the number of terms (connecting edges E).

A

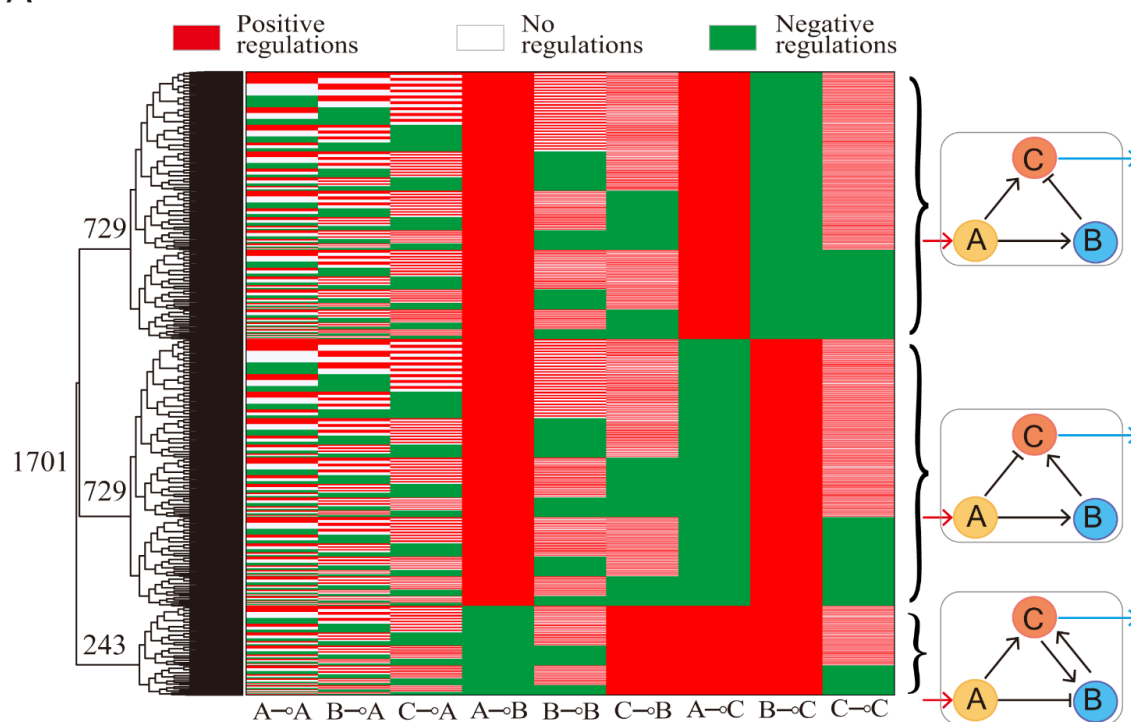

B

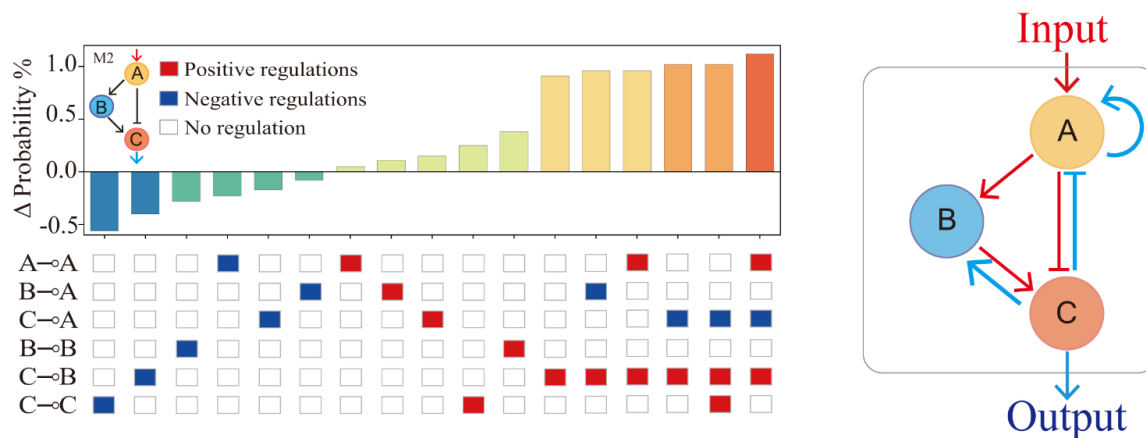

C

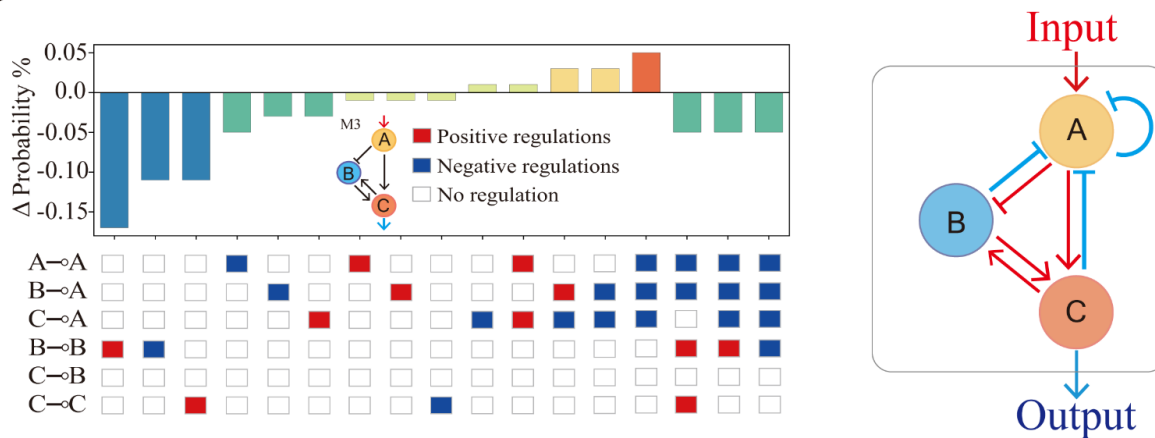



975 **Figure S7.** (A) Clustering of the 1,701 three-node circuits that can achieve BE dynamics. The core  
976 circuits associated with each of the sub-cluster are shown on the right. (B) and (C) Probability  
977 statistics of BE dynamics that can be achieved by randomly adding edges based on circuit M2 and  
978 M3.  
979  
980
